# Supplementary material for: Pd-catalyzed tandem homocoupling–aldol–dehydration of ortho-acylphenyl iodides
Source: Royal Society of Chemistry journal article supplement (doi:10.1039/c4ra02055c), 2014-01-01

## Pd-Catalyzed Tandem Homocoupling-Aldol-Dehydration of *ortho*-Acylcarbonylphenyl Iodides

Meiqin Fu,<sup>†</sup> Dongen Lin,<sup>†</sup> Yuanfu Deng,<sup>†</sup> Xiao-Qi Zhang,<sup>§</sup> Yanchu Liu,<sup>†</sup> Chunsong Lai,<sup>†</sup> and  
Wei Zeng<sup>\*,†</sup>

<sup>†</sup> School of Chemistry and Chemical Engineering, South China University of Technology, 381 Wushan Road,  
Tianhe District, Guangzhou, China, 510641

<sup>§</sup> School of Pharmaceutical Sciences, Jinan University, Guangzhou 510632, China  
zengwei@scut.edu.cn

### Supporting Information

#### Table of Contents

|                                                                                                                              |    |
|------------------------------------------------------------------------------------------------------------------------------|----|
| 1. General experimental information .....                                                                                    | 2  |
| 1.1 General methods .....                                                                                                    | 2  |
| 1.2 Table S1. The effect of bases on the Pd(II)-catalyzed tandem homocoupling-aldol-dehydration<br>of <b>1b</b> .....        | 2  |
| 1.3 Table S2. The effect of temperature on the Pd(II)-catalyzed tandem homocoupling-aldol-<br>dehydration of <b>1b</b> ..... | 3  |
| 1.4 Table S3. Catalyst screening for this transformation.....                                                                | 3  |
| 1.5 Table S4. The effect of solvents on the Pd(II)-catalyzed tandem homocoupling-aldol-<br>dehydration of <b>1b</b> .....    | 3  |
| 1.6 Table S5. Ligand screening on tandem homocoupling-aldol-dehydration of <b>1b</b> .....                                   | 4  |
| 1.7 Table S6. The effect of halogen atoms on the Pd(II)-catalyzed tandem homocoupling-aldol-<br>dehydration .....            | 5  |
| 1.8 Table S7. Ligand screening on tandem homocoupling-aldol-dehydration of <b>1c</b> .....                                   | 5  |
| 2. The single crystal structure and crystallographic data for <b>3a</b> .....                                                | 6  |
| 3. Copies of <sup>1</sup> H and <sup>13</sup> C NMR spectra for all the isolated intermediates and products .....            | 11 |

## 1. General experimental information

### 1.1. General methods

Unless otherwise noted, all experiments were performed under argon atmosphere. All reagents were purchased from TCI, Acros or strem. Solvents were treated with 4 Å molecular sieves or sodium and distilled prior to use. Purifications of reaction products were carried out by flash chromatography using Qingdao Haiyang Chemical Co.Ltd silica gel (40-63 mm). Infrared spectra (IR) were recorded on a Bruker TENSOR 27 FTIR spectrophotometer and are reported as wavelength numbers (cm<sup>-1</sup>). Infrared spectra were recorded by preparing a KBr pellet containing the title compound. <sup>1</sup>H and <sup>13</sup>C NMR spectra were recorded with tetramethylsilane (TMS) as internal standard at ambient temperature unless otherwise indicated on a Bruker Avance DPX 600 fourier Transform spectrometer operating at 400 MHz for <sup>1</sup>H and 100 MHz for <sup>13</sup>C. Chemical shifts are reported in parts per million (ppm) and coupling constants are reported as Hertz (Hz). Splitting patterns are designated as singlet (s), broad singlet (bs), doublet (d), triplet (t). Splitting patterns that could not be interpreted or easily visualized are designated as multiplet (m). Low resolution mass spectra were taken on a GC-MS instrument. High resolution mass spectra (HRMS) were recorded on an IF-TOF spectrometer (Micromass). Compounds described in the literatures were characterized by comparison of their <sup>1</sup>H, and <sup>13</sup>C NMR spectra to the previously reported data. Crystal data were collected on a Bruker D8 Advance employing graphite monochromated Mo - K $\alpha$  radiation ( $\lambda = 0.71073$  Å) at 293 (2) K and operating in the  $\phi$ - $\omega$ scan mode. The structure was solved by direct methods SHELXS-97.

**Table S1. The effect of base on the Pd (II) catalyzed tandem homocoupling-aldol-dehydration of 1b<sup>a</sup>**

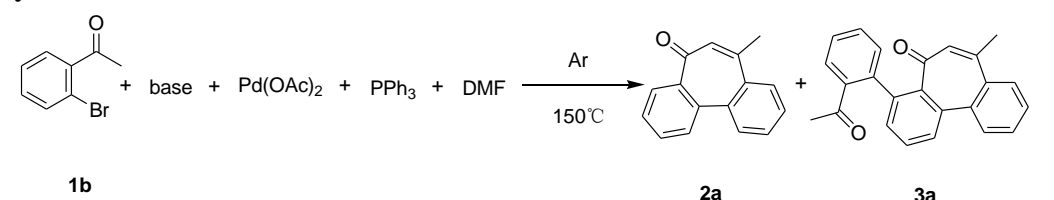

| entry | base                                                                                | yield of <b>2a</b> (%) <sup>b</sup> | yield of <b>3a</b> (%) <sup>b</sup> |
|-------|-------------------------------------------------------------------------------------|-------------------------------------|-------------------------------------|
| 1     | K <sub>2</sub> CO <sub>3</sub>                                                      | 32                                  | 32                                  |
| 2     | KHCO <sub>3</sub>                                                                   | 19                                  | 12                                  |
| 3     | Na <sub>2</sub> CO <sub>3</sub>                                                     | 19                                  | 8                                   |
| 4     | NaHCO <sub>3</sub>                                                                  | 23                                  | 16                                  |
| 5     | Cs <sub>2</sub> CO <sub>3</sub>                                                     | 14                                  | 10                                  |
| 6     | NaOtBu                                                                              | 38                                  | 5                                   |
| 7     | NEt <sub>3</sub>                                                                    | -                                   | 16                                  |
| 8     |  | -                                   | 10                                  |
| 9     |  | -                                   | 12                                  |

<sup>a</sup> All the reactions were run with **1b** (0.2 mmol), base (0.3 mmol), Pd(OAc)<sub>2</sub> (5 mol %), PPh<sub>3</sub> (10 mol %), and DMF (1.0 mL) under Ar in a sealed pressure tube at 150 °C for 3 h, followed by flash chromatography on SiO<sub>2</sub>. <sup>b</sup> Isolated yield.

**Table S2. The effect of the reaction temperature on the Pd(II) catalyzed tandem homocoupling-adol-dehydration of **1b**<sup>a</sup>**

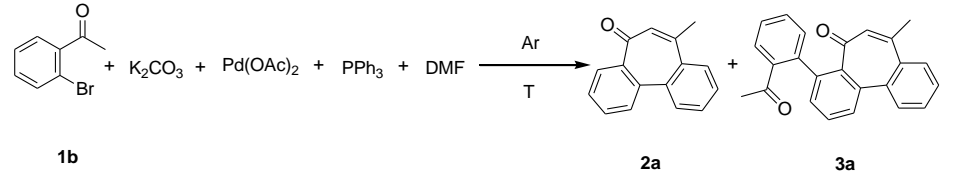

| entry | temp(°C) | yield of <b>2a</b> (%) <sup>b</sup> | yield of <b>3a</b> (%) <sup>b</sup> |
|-------|----------|-------------------------------------|-------------------------------------|
| 1     | 110      | 18                                  | 12                                  |
| 2     | 130      | 22                                  | 12                                  |
| 3     | 150      | 32                                  | 32                                  |
| 4     | 160      | 28                                  | 18                                  |
| 5     | 170      | 41                                  | 10                                  |

<sup>a</sup> All the reactions were run with **1b** (0.2 mmol), K<sub>2</sub>CO<sub>3</sub> (0.3 mmol), Pd(OAc)<sub>2</sub> (5 mol %), PPh<sub>3</sub> (10 mol %), and DMF (1.0 mL) under Ar in a sealed pressure tube for 3 h, followed by flash chromatography on SiO<sub>2</sub>. <sup>b</sup> Isolated yield.

**Table S3. Catalyst screening for this transformation<sup>a</sup>**

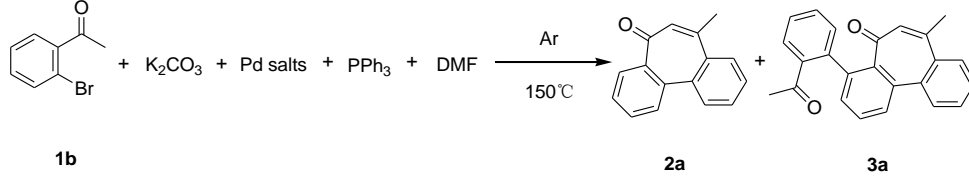

| entry | Pd salts                                            | yield of <b>2a</b> (%) <sup>b</sup> | yield of <b>3a</b> (%) <sup>b</sup> |
|-------|-----------------------------------------------------|-------------------------------------|-------------------------------------|
| 1     | Pd(OAc) <sub>2</sub>                                | 32                                  | 32                                  |
| 2     | PdCl <sub>2</sub>                                   | 41                                  | 37                                  |
| 3     | PdCl <sub>2</sub> (CH <sub>3</sub> CN) <sub>2</sub> | 32                                  | 32                                  |
| 4     | Pd(TFA) <sub>2</sub>                                | 28                                  | 37                                  |

<sup>a</sup> All the Reactions were run with **1b** (0.2 mmol), K<sub>2</sub>CO<sub>3</sub> (0.3 mmol), Pd salts (5 mol %), PPh<sub>3</sub> (10 mol %), and DMF (1.0 mL) under Ar in a sealed pressure tube at 150 °C for 3 h, followed by flash chromatography on SiO<sub>2</sub>. <sup>b</sup> Isolated yield.

**Table S4. The effect of solvents on the Pd(II) catalyzed tandem homocoupling-adol-dehydration of **1b**<sup>a</sup>**

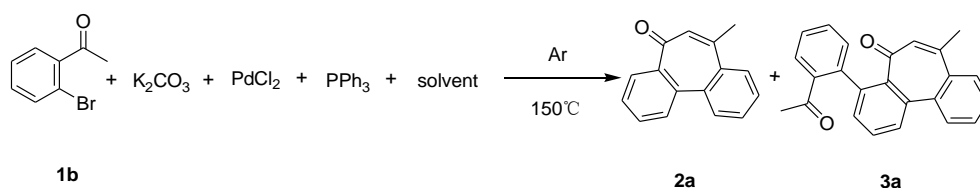

| entry | solvent | yield of <b>2a</b> (%) <sup>b</sup> | yield of <b>3a</b> (%) <sup>b</sup> |
|-------|---------|-------------------------------------|-------------------------------------|
| 1     | DMF     | 41                                  | 37                                  |
| 2     | Xy-lene | 22                                  | 18                                  |
| 3     | DMA     | 38                                  | 38                                  |
| 4     | DMSO    | 38                                  | 14                                  |
| 5     | NMP     | 32                                  | 18                                  |

<sup>a</sup> All the Reactions were run with **1b** (0.2 mmol), K<sub>2</sub>CO<sub>3</sub> (0.3 mmol), PdCl<sub>2</sub> (5 mol %), PPh<sub>3</sub> (10 mol %), and solvent (1.0 mL) under Ar in a sealed pressure tube at 150 °C for 3 h, followed by flash chromatography on SiO<sub>2</sub>. <sup>b</sup> Isolated yield.

**Table S5. Ligand screening for Pd-catalyzed tandem homocoupling-aldol-dehydration of **1b**<sup>a</sup>**

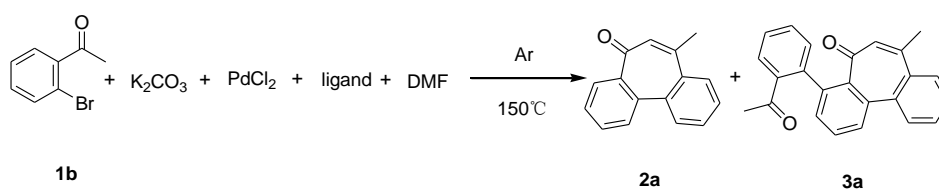

| entry | ligand                | yield of <b>2a</b> (%) <sup>b</sup> | yield of <b>3a</b> (%) <sup>b</sup> |
|-------|-----------------------|-------------------------------------|-------------------------------------|
| 1     | <b>L</b> <sub>1</sub> | 41                                  | 37                                  |
| 2     | <b>L</b> <sub>2</sub> | 41                                  | 42                                  |
| 3     | <b>L</b> <sub>3</sub> | 42                                  | 39                                  |
| 4     | <b>L</b> <sub>4</sub> | 32                                  | 18                                  |
| 5     | <b>L</b> <sub>5</sub> | -                                   | 22                                  |
| 6     | <b>L</b> <sub>6</sub> | -                                   | -                                   |
| 7     | <b>L</b> <sub>7</sub> | -                                   | -                                   |
| 8     | -                     | 28                                  | 13                                  |

<sup>a</sup> All the Reactions were run with **1b** (0.2 mmol), K<sub>2</sub>CO<sub>3</sub> (0.3 mmol), PdCl<sub>2</sub> (5 mol %), ligand (10 mol %), and DMF (1.0 mL) under Ar in a sealed pressure tube at 150 °C for 3 h, followed by flash chromatography on SiO<sub>2</sub>. <sup>b</sup> Isolated yield. L = ligand

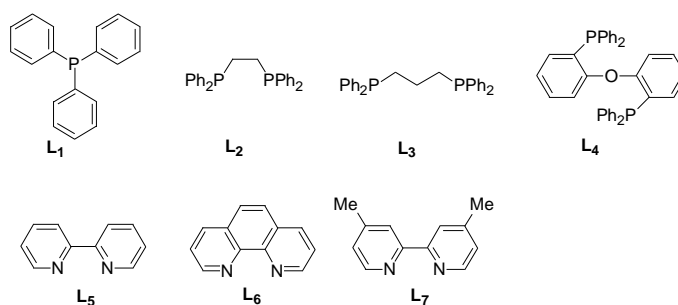

**Table S6. The effect of substrate structure on Pd (II) catalyzed tandem homocoupling-aldol-dehydration of **1b**<sup>a</sup>**

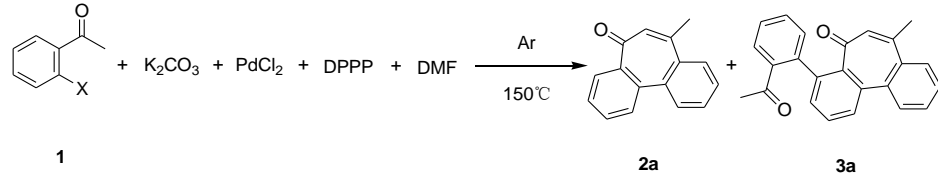

| entry | X  | yield of <b>2a</b> (%) <sup>b</sup> | yield of <b>3a</b> (%) <sup>b</sup> |
|-------|----|-------------------------------------|-------------------------------------|
| 1     | Br | 41                                  | 42                                  |
| 2     | I  | 80                                  | <5                                  |
| 3     | Cl | -                                   | -                                   |

<sup>a</sup> All the Reactions were run with **1** (0.2 mmol), K<sub>2</sub>CO<sub>3</sub> (0.3 mmol), PdCl<sub>2</sub> (5 mol %), DPPP(10 mol %), and DMF (1.0 mL) under Ar in a sealed pressure tube at 150 °C for 1h, followed by flash chromatography on SiO<sub>2</sub>. <sup>b</sup> Isolated yield.

**Table S7. Ligand screening for the Pd-catalyzed tandem homocoupling-aldol-dehydration of **1c**<sup>a</sup>**

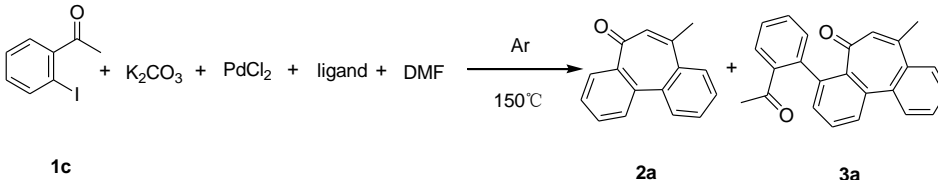

| entry          | ligand                | yield of <b>2a</b> (%) <sup>b</sup> | yield of <b>3a</b> (%) <sup>b</sup> |
|----------------|-----------------------|-------------------------------------|-------------------------------------|
| 1              | <b>L</b> <sub>1</sub> | 14                                  | 28                                  |
| 2              | <b>L</b> <sub>2</sub> | 60                                  | 4                                   |
| 3              | <b>L</b> <sub>3</sub> | 80                                  | 5                                   |
| 4              | <b>L</b> <sub>4</sub> | 46                                  | 18                                  |
| 5 <sup>c</sup> | <b>L</b> <sub>3</sub> | 71                                  | 4                                   |

<sup>a</sup> All the Reactions were run with **1c** (0.2 mmol), K<sub>2</sub>CO<sub>3</sub> (0.3 mmol), PdCl<sub>2</sub> (5 mol %), ligand (10 mol %), and DMF (1.0 mL) under Ar in a sealed pressure tube at 150 °C for 3 h, followed by flash chromatography on SiO<sub>2</sub>. <sup>b</sup> Isolated yield. **L** = ligand. <sup>c</sup> The reaction temperature was 140 °C.

## 2. The single crystal structure and crystallographic data for 3a

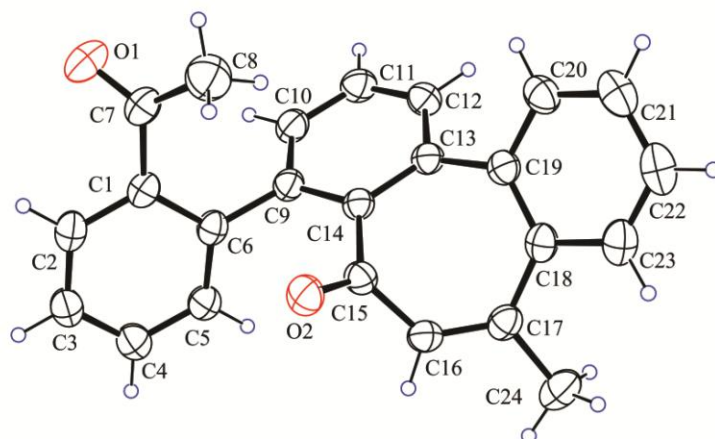

**Figure S1** The Single crystal structure of compound **3a**

**Table S8** Crystal data and structure refinement for **3a**

| Identification code               | 3a                                             |
|-----------------------------------|------------------------------------------------|
| Empirical formula                 | C <sub>24</sub> H <sub>18</sub> O <sub>2</sub> |
| Formula weight                    | 338.38                                         |
| Crystal system                    | Monoclinic, P21/n                              |
| space group                       | P-21/c                                         |
| Temperature                       | 293 (2) K                                      |
| Wavelength                        | 0.71073 Å                                      |
| a (Å)                             | 11.264 (2)                                     |
| b (Å)                             | 7.0576 (2)                                     |
| c (Å)                             | 22.435 (2)                                     |
| α (°)                             | 90 (3)                                         |
| β (°)                             | 93.75 (3)                                      |
| γ (°)                             | 90 (3)                                         |
| V (Å <sup>3</sup> )               | 1779.7(6) Å <sup>3</sup>                       |
| Z, Calculated density             | 4, 1.263 Mg/m <sup>3</sup>                     |
| Absorption coefficient            | 0.079 mm <sup>-1</sup>                         |
| Crystal size                      | 0.20 x 0.20 x 0.15 mm                          |
| F (000)                           | 712.0                                          |
| Theta range for data collection   | 3.03 to 27.48 deg                              |
| Reflections collected / unique    | 16740 / 4058 [R(int) = 0.0546]                 |
| Limiting indices                  | -14<=h<=14, -9<=k<=9, -27<=l<=29               |
| Goodness-of-fit on F <sup>2</sup> | 1.021                                          |
| Rindices (all data)               | R1 = 0.1286, wR2 = 0.2021                      |

**Table S9. Atomic coordinates (  $\times 10^4$ ) and equivalent isotropic displacement parameters ( $\text{\AA}^2 \times 10^3$ ) for 3a. U(eq) is defined as one third of the trace of the orthogonalized Uij tensor.**

|       | x        | y        | z       | U(eq) |
|-------|----------|----------|---------|-------|
| O(1)  | -1768(2) | 1794(4)  | 842(1)  | 87(1) |
| O(2)  | 2348(2)  | 3142(3)  | 2135(1) | 69(1) |
| C(1)  | -52(2)   | 628(4)   | 1364(1) | 54(1) |
| C(2)  | -651(2)  | -603(4)  | 1727(1) | 62(1) |
| C(3)  | -58(2)   | -1993(5) | 2053(1) | 65(1) |
| C(4)  | 1139(2)  | -2224(5) | 2007(1) | 66(1) |
| C(5)  | 1749(2)  | -1054(4) | 1645(1) | 60(1) |
| C(6)  | 1181(2)  | 417(4)   | 1327(1) | 52(1) |
| C(7)  | -771(2)  | 2143(4)  | 1053(1) | 61(1) |
| C(8)  | -327(3)  | 4115(6)  | 1039(2) | 97(1) |
| C(9)  | 1844(2)  | 1592(4)  | 909(1)  | 52(1) |
| C(10) | 1625(2)  | 1317(4)  | 302(1)  | 61(1) |
| C(11) | 2207(2)  | 2356(5)  | -108(1) | 66(1) |
| C(12) | 2991(2)  | 3741(4)  | 80(1)   | 61(1) |
| C(13) | 3263(2)  | 4073(4)  | 688(1)  | 51(1) |
| C(14) | 2707(2)  | 2944(4)  | 1104(1) | 49(1) |
| C(15) | 3070(2)  | 3108(4)  | 1752(1) | 52(1) |
| C(16) | 4348(2)  | 2951(4)  | 1913(1) | 57(1) |
| C(17) | 5215(2)  | 4027(4)  | 1715(1) | 57(1) |
| C(18) | 4961(2)  | 5672(4)  | 1316(1) | 55(1) |
| C(19) | 4046(2)  | 5707(4)  | 862(1)  | 53(1) |
| C(20) | 3846(2)  | 7370(4)  | 534(1)  | 65(1) |
| C(21) | 4524(3)  | 8968(5)  | 645(1)  | 77(1) |
| C(22) | 5457(3)  | 8914(5)  | 1075(2) | 80(1) |
| C(23) | 5671(2)  | 7291(5)  | 1399(1) | 71(1) |
| C(24) | 6477(2)  | 3656(6)  | 1936(1) | 82(1) |

**Table S10 Bond lengths [Å] and angles [deg] for 3a**

|            |          |
|------------|----------|
| O(1)-C(7)  | 1.215(3) |
| O(2)-C(15) | 1.222(3) |
| C(1)-C(2)  | 1.395(4) |
| C(1)-C(6)  | 1.404(3) |
| C(1)-C(7)  | 1.488(4) |
| C(2)-C(3)  | 1.371(4) |

|             |          |
|-------------|----------|
| C(3)-C(4)   | 1.369(4) |
| C(4)-C(5)   | 1.373(4) |
| C(5)-C(6)   | 1.392(4) |
| C(6)-C(9)   | 1.488(3) |
| C(7)-C(8)   | 1.480(5) |
| C(9)-C(10)  | 1.383(3) |
| C(9)-C(14)  | 1.412(4) |
| C(10)-C(11) | 1.375(4) |
| C(11)-C(12) | 1.365(4) |
| C(12)-C(13) | 1.399(3) |
| C(13)-C(14) | 1.405(3) |
| C(13)-C(19) | 1.489(4) |
| C(14)-C(15) | 1.488(3) |
| C(15)-C(16) | 1.465(3) |
| C(16)-C(17) | 1.336(4) |
| C(17)-C(18) | 1.483(4) |
| C(17)-C(24) | 1.498(4) |
| C(18)-C(23) | 1.400(4) |
| C(18)-C(19) | 1.401(3) |
| C(19)-C(20) | 1.396(4) |
| C(20)-C(21) | 1.375(4) |
| C(21)-C(22) | 1.380(5) |
| C(22)-C(23) | 1.370(5) |

|                   |          |
|-------------------|----------|
| C(2)-C(1)-C(6)    | 119.1(3) |
| C(2)-C(1)-C(7)    | 116.9(2) |
| C(6)-C(1)-C(7)    | 124.0(2) |
| C(3)-C(2)-C(1)    | 121.3(2) |
| C(4)-C(3)-C(2)    | 119.5(3) |
| C(3)-C(4)-C(5)    | 120.4(3) |
| C(4)-C(5)-C(6)    | 121.4(2) |
| C(5)-C(6)-C(1)    | 118.2(2) |
| C(5)-C(6)-C(9)    | 120.3(2) |
| C(1)-C(6)-C(9)    | 121.2(2) |
| O(1)-C(7)-C(8)    | 119.2(3) |
| O(1)-C(7)-C(1)    | 119.9(3) |
| C(8)-C(7)-C(1)    | 120.7(2) |
| C(10)-C(9)-C(14)  | 118.3(2) |
| C(10)-C(9)-C(6)   | 118.6(2) |
| C(14)-C(9)-C(6)   | 123.1(2) |
| C(11)-C(10)-C(9)  | 121.5(3) |
| C(12)-C(11)-C(10) | 120.1(2) |
| C(11)-C(12)-C(13) | 121.1(2) |
| C(12)-C(13)-C(14) | 118.4(2) |



|                   |          |
|-------------------|----------|
| C(12)-C(13)-C(19) | 118.3(2) |
| C(14)-C(13)-C(19) | 123.1(2) |
| C(13)-C(14)-C(9)  | 120.3(2) |
| C(13)-C(14)-C(15) | 120.0(2) |
| C(9)-C(14)-C(15)  | 119.6(2) |
| O(2)-C(15)-C(16)  | 121.1(2) |
| O(2)-C(15)-C(14)  | 122.4(2) |
| C(16)-C(15)-C(14) | 115.9(2) |
| C(17)-C(16)-C(15) | 127.1(3) |
| C(16)-C(17)-C(18) | 121.9(2) |
| C(16)-C(17)-C(24) | 119.3(3) |
| C(18)-C(17)-C(24) | 118.6(2) |
| C(23)-C(18)-C(19) | 118.0(3) |
| C(23)-C(18)-C(17) | 118.2(2) |
| C(19)-C(18)-C(17) | 123.9(2) |
| C(20)-C(19)-C(18) | 118.9(3) |
| C(20)-C(19)-C(13) | 116.2(2) |
| C(18)-C(19)-C(13) | 124.9(2) |
| C(21)-C(20)-C(19) | 121.7(3) |
| C(20)-C(21)-C(22) | 119.5(3) |
| C(23)-C(22)-C(21) | 119.6(3) |
| C(22)-C(23)-C(18) | 122.2(3) |

**Table S11 Anisotropic displacement parameters ( $\text{\AA}^2 \times 10^3$ ) for 3a. The anisotropic displacement factor exponent takes the form:  $-2 \pi^2 [ h^2 a^{*2} U_{11} + \dots + 2 h k a^* b^* U_{12} ]$**

|       | U11   | U22   | U33    | U23    | U13    | U12    |
|-------|-------|-------|--------|--------|--------|--------|
| O(1)  | 59(1) | 98(2) | 102(2) | -11(1) | -19(1) | 3(1)   |
| O(2)  | 64(1) | 93(2) | 53(1)  | -4(1)  | 15(1)  | -4(1)  |
| C(1)  | 46(1) | 58(2) | 57(1)  | -9(1)  | 2(1)   | -2(1)  |
| C(2)  | 52(1) | 73(2) | 63(2)  | -12(2) | 12(1)  | -11(1) |
| C(3)  | 66(2) | 68(2) | 64(2)  | 1(2)   | 13(1)  | -11(2) |
| C(4)  | 70(2) | 63(2) | 67(2)  | 4(1)   | 7(1)   | -4(1)  |
| C(5)  | 53(1) | 63(2) | 64(2)  | 2(1)   | 6(1)   | 2(1)   |
| C(6)  | 46(1) | 58(2) | 53(1)  | -7(1)  | 7(1)   | -3(1)  |
| C(7)  | 52(1) | 68(2) | 63(2)  | -13(1) | 1(1)   | 1(1)   |
| C(9)  | 44(1) | 59(2) | 52(1)  | -1(1)  | 3(1)   | -1(1)  |
| C(10) | 52(1) | 72(2) | 57(2)  | -3(1)  | 0(1)   | -3(1)  |
| C(11) | 66(2) | 82(2) | 47(1)  | -2(1)  | -2(1)  | -2(2)  |
| C(12) | 62(1) | 71(2) | 50(1)  | 7(1)   | 6(1)   | -1(1)  |

|       |       |        |       |        |       |        |
|-------|-------|--------|-------|--------|-------|--------|
| C(13) | 47(1) | 59(2)  | 48(1) | 2(1)   | 5(1)  | 4(1)   |
| C(14) | 43(1) | 57(2)  | 47(1) | 1(1)   | 6(1)  | 4(1)   |
| C(15) | 53(1) | 55(2)  | 49(1) | 3(1)   | 7(1)  | 0(1)   |
| C(16) | 56(1) | 67(2)  | 49(1) | 5(1)   | -2(1) | 1(1)   |
| C(17) | 51(1) | 70(2)  | 51(1) | -8(1)  | 3(1)  | -1(1)  |
| C(18) | 51(1) | 60(2)  | 56(1) | -10(1) | 13(1) | -5(1)  |
| C(19) | 50(1) | 57(2)  | 51(1) | -1(1)  | 9(1)  | 1(1)   |
| C(20) | 66(2) | 64(2)  | 66(2) | 9(1)   | 18(1) | 3(1)   |
| C(21) | 88(2) | 61(2)  | 86(2) | 5(2)   | 33(2) | -1(2)  |
| C(22) | 88(2) | 65(2)  | 89(2) | -12(2) | 33(2) | -20(2) |
| C(23) | 66(2) | 78(3)  | 70(2) | -15(2) | 16(1) | -16(2) |
| C(24) | 55(2) | 110(3) | 79(2) | -11(2) | -5(1) | 4(2)   |

**Table S12 Hydrogen coordinates (  $\times 10^4$ ) and isotropic displacement parameters ( $\text{\AA}^2 \times 10^3$ ) for 3a**

|        | x     | y     | z    | U(eq) |
|--------|-------|-------|------|-------|
| H(2A)  | -1469 | -479  | 1748 | 75    |
| H(3A)  | -465  | -2773 | 2304 | 78    |
| H(4A)  | 1542  | -3181 | 2221 | 80    |
| H(5A)  | 2559  | -1248 | 1612 | 72    |
| H(8A)  | -900  | 4897  | 820  | 145   |
| H(8B)  | 412   | 4144  | 849  | 145   |
| H(8C)  | -203  | 4584  | 1440 | 145   |
| H(10A) | 1072  | 410   | 167  | 73    |
| H(11A) | 2066  | 2115  | -514 | 79    |
| H(12A) | 3351  | 4476  | -202 | 73    |
| H(16A) | 4580  | 1997  | 2181 | 69    |
| H(20A) | 3239  | 7399  | 232  | 78    |
| H(21A) | 4355  | 10077 | 432  | 92    |
| H(22A) | 5938  | 9973  | 1144 | 96    |
| H(23A) | 6309  | 7263  | 1684 | 85    |
| H(24A) | 6507  | 2558  | 2190 | 123   |
| H(24B) | 6783  | 4732  | 2158 | 123   |
| H(24C) | 6950  | 3438  | 1602 | 123   |

4. Copies of  $^1\text{H}$  and  $^{13}\text{C}$  NMR spectra for all the isolated intermediates and products

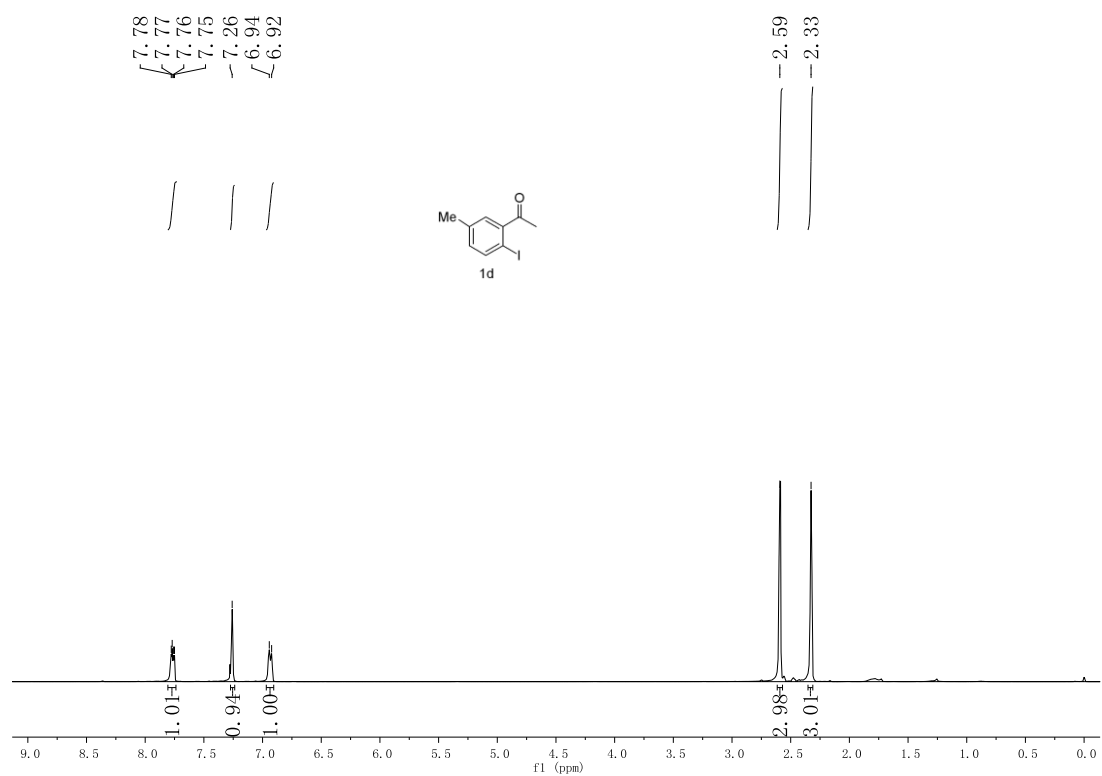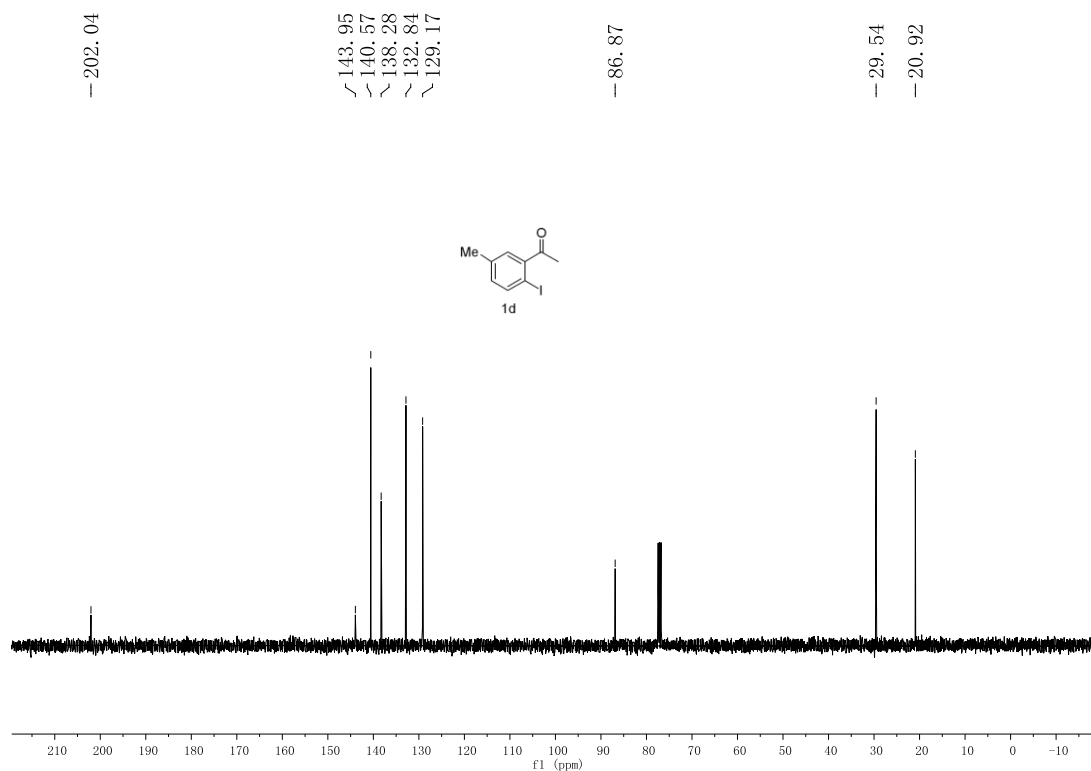

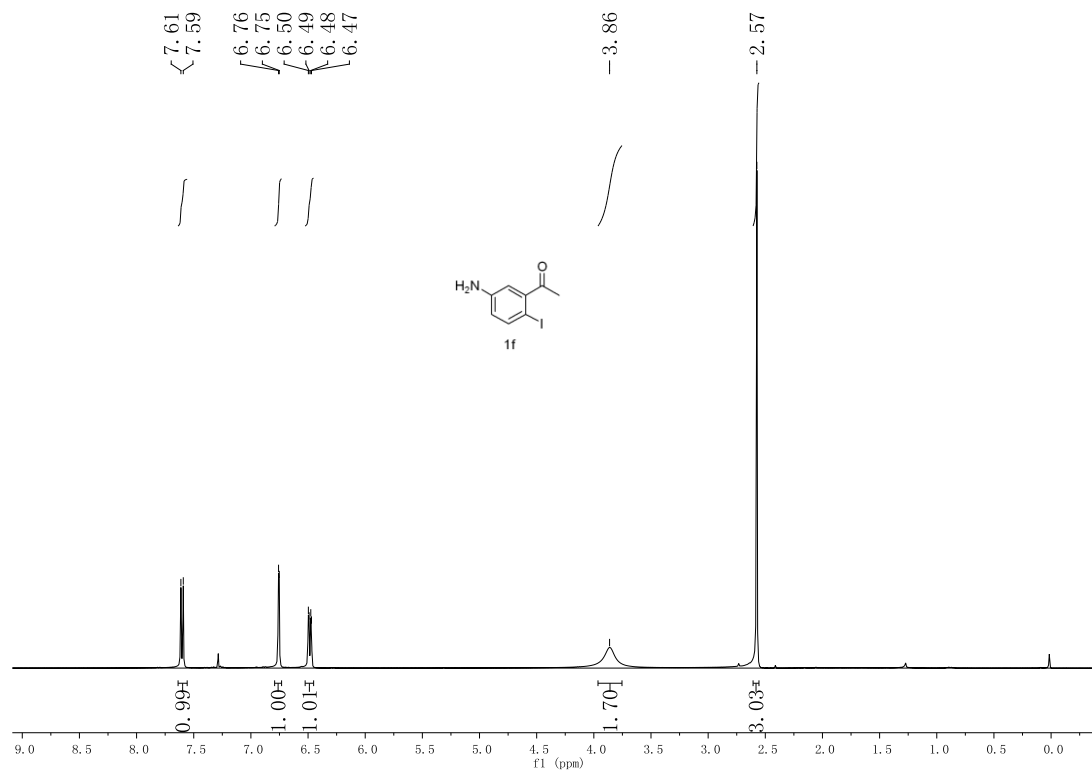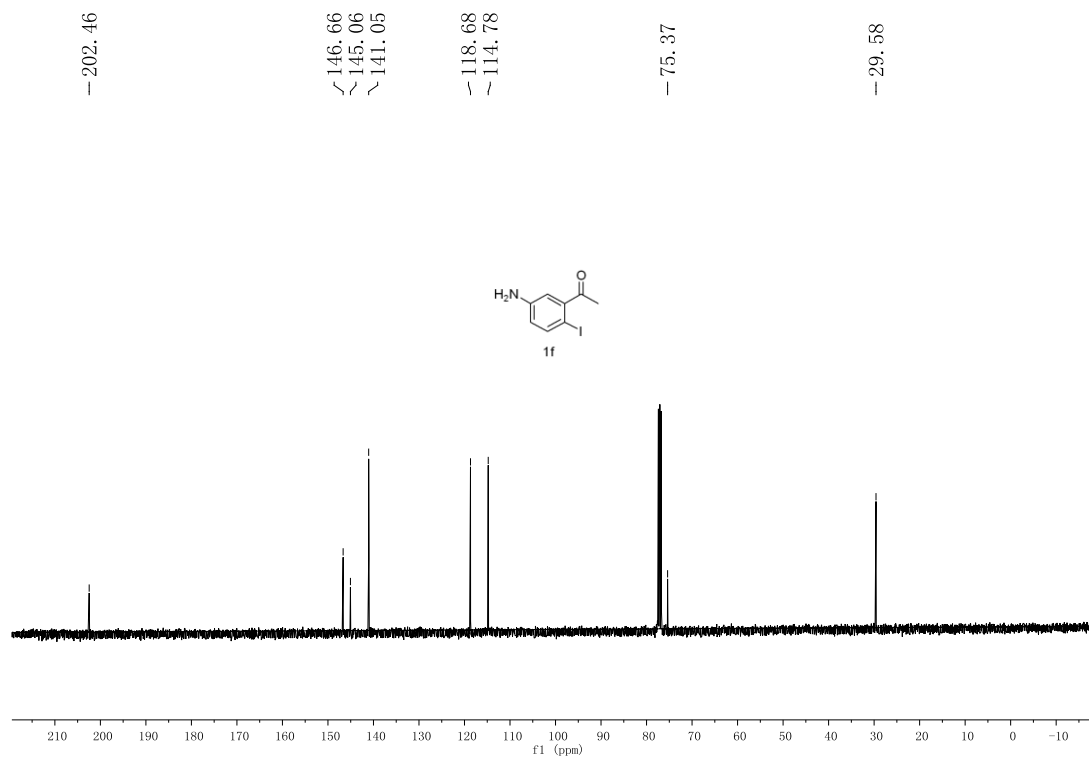

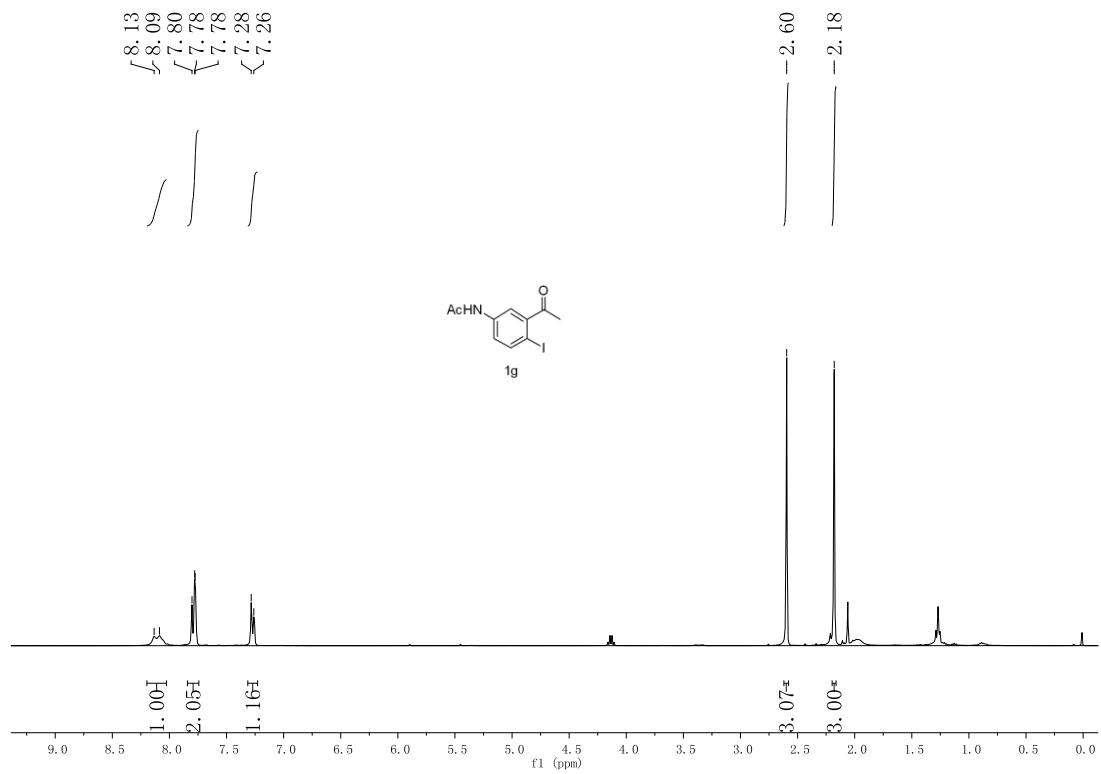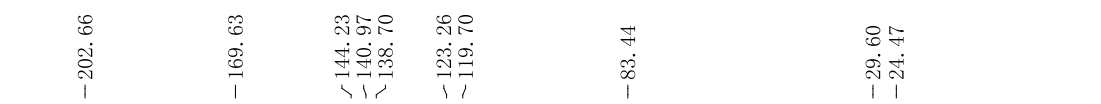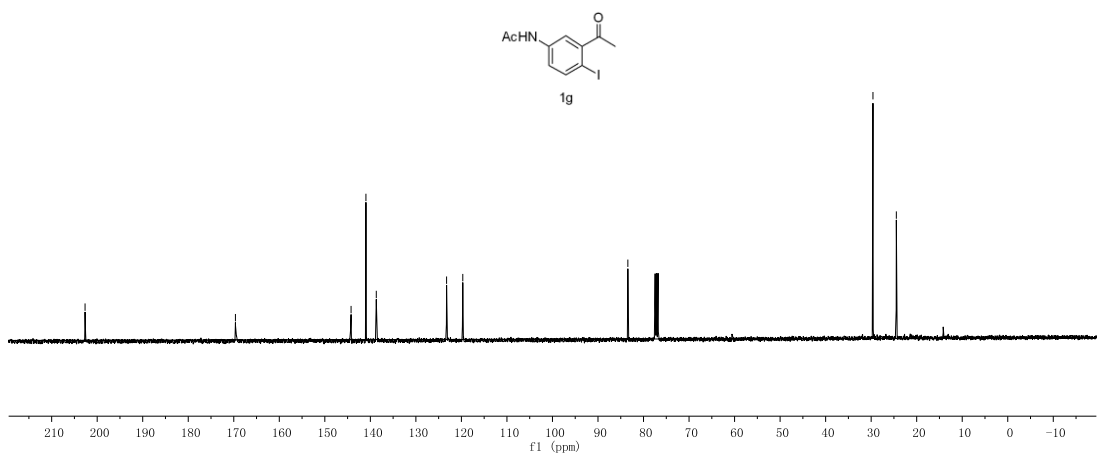

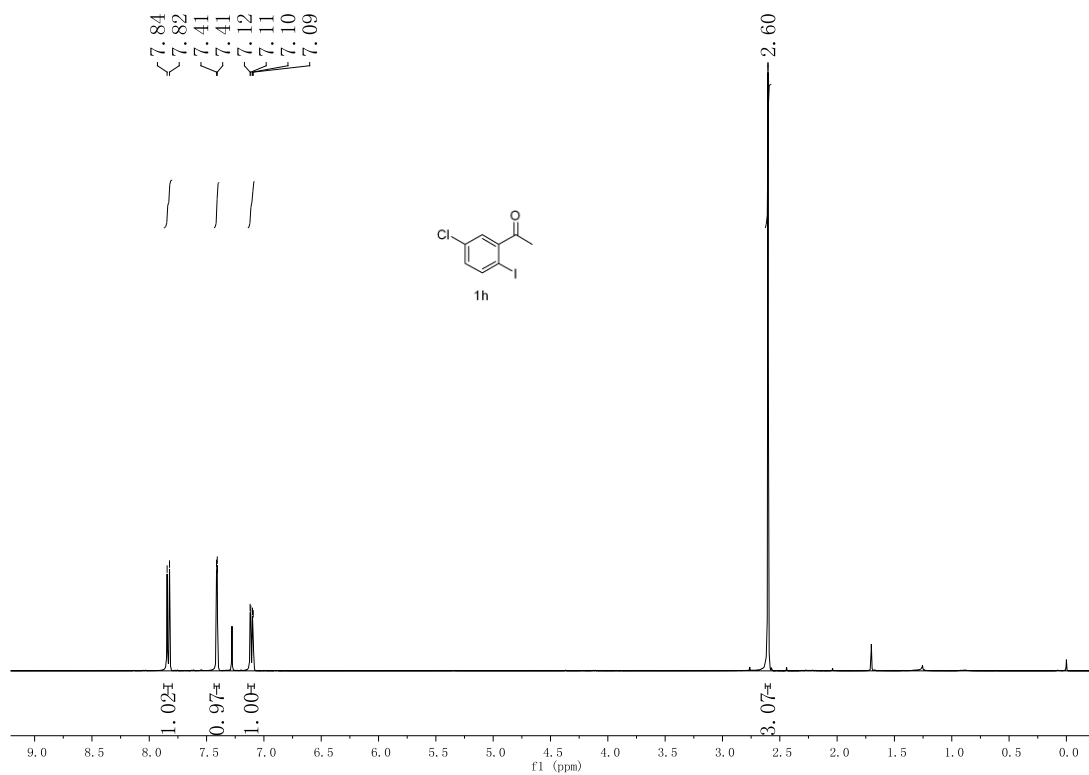

-200.38

~145.47  
~141.91  
~134.74  
~131.86  
~128.37

-88.01

-29.40

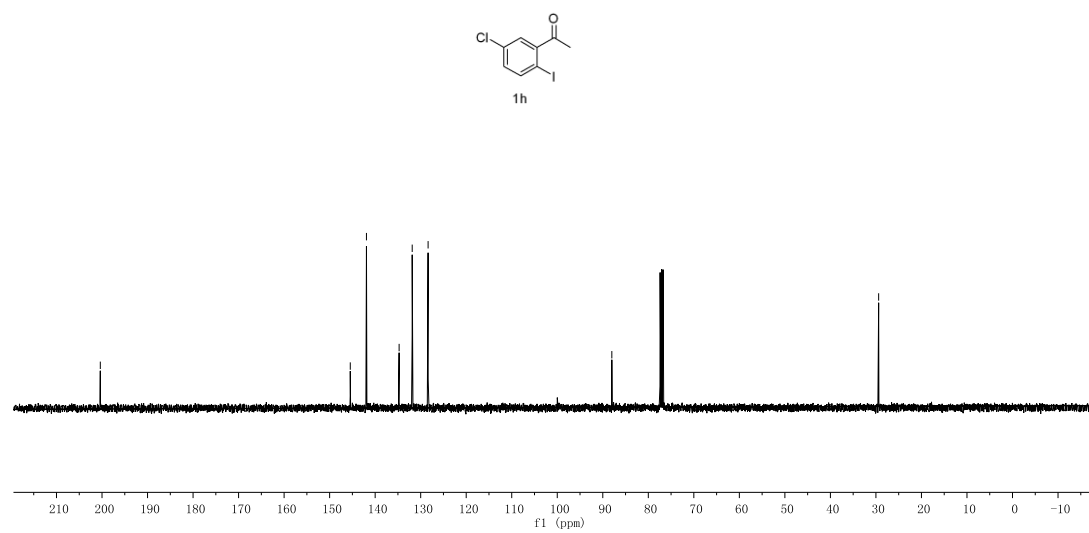

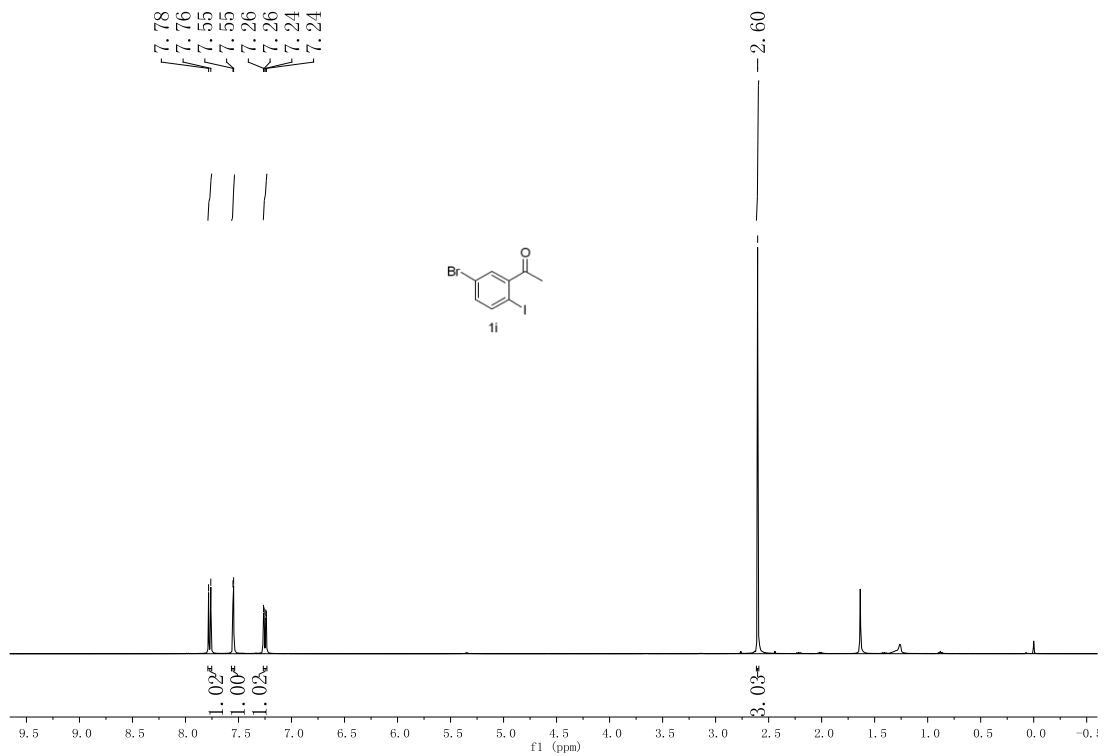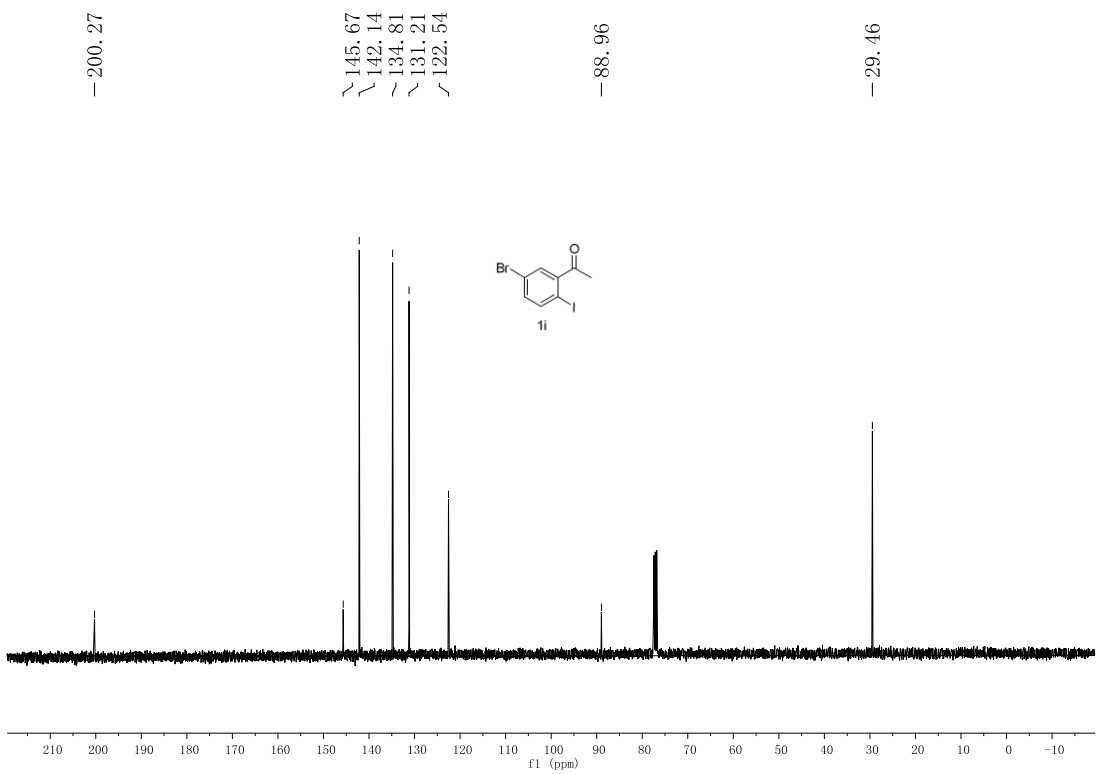

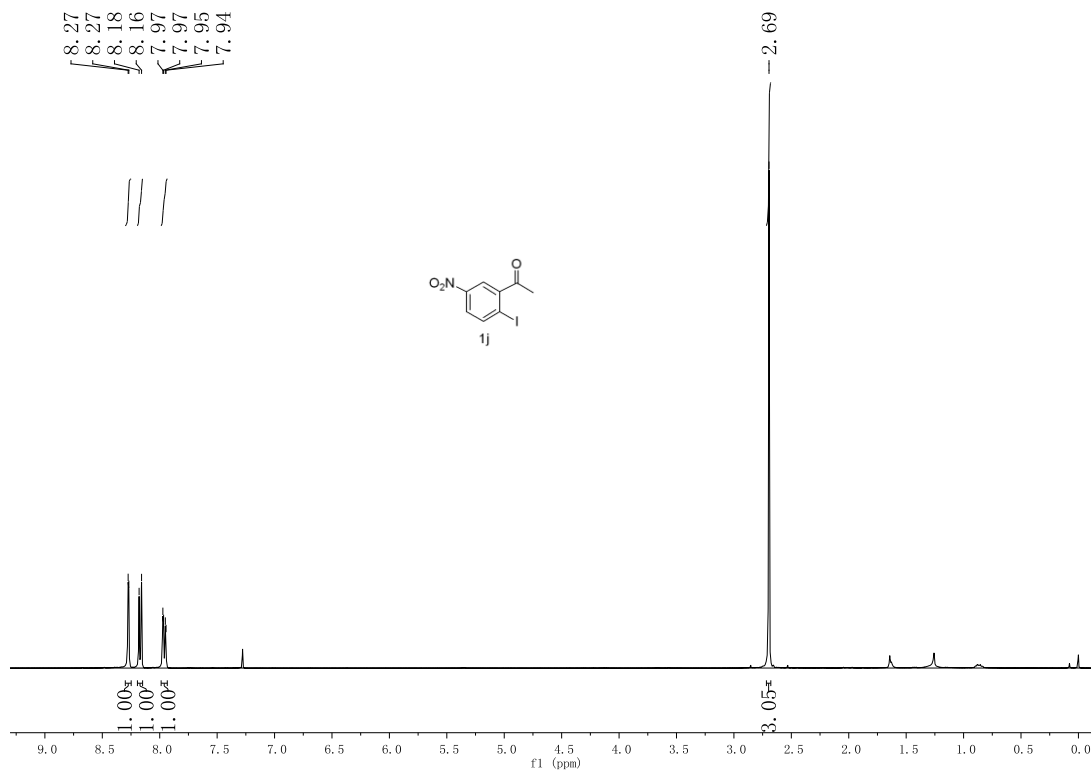

- 199.51

147.82  
145.05  
142.30

125.66  
122.69

- 99.39

- 29.34

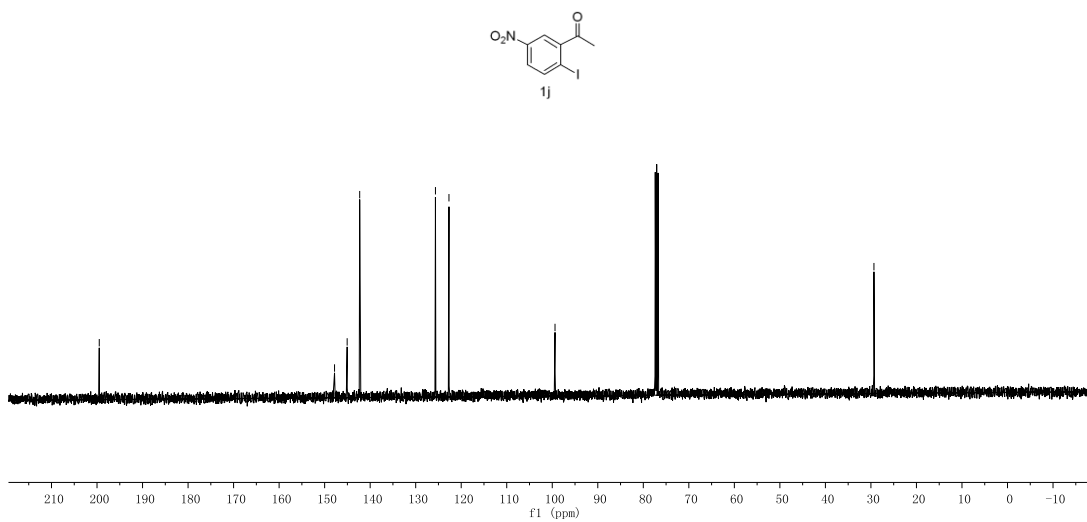



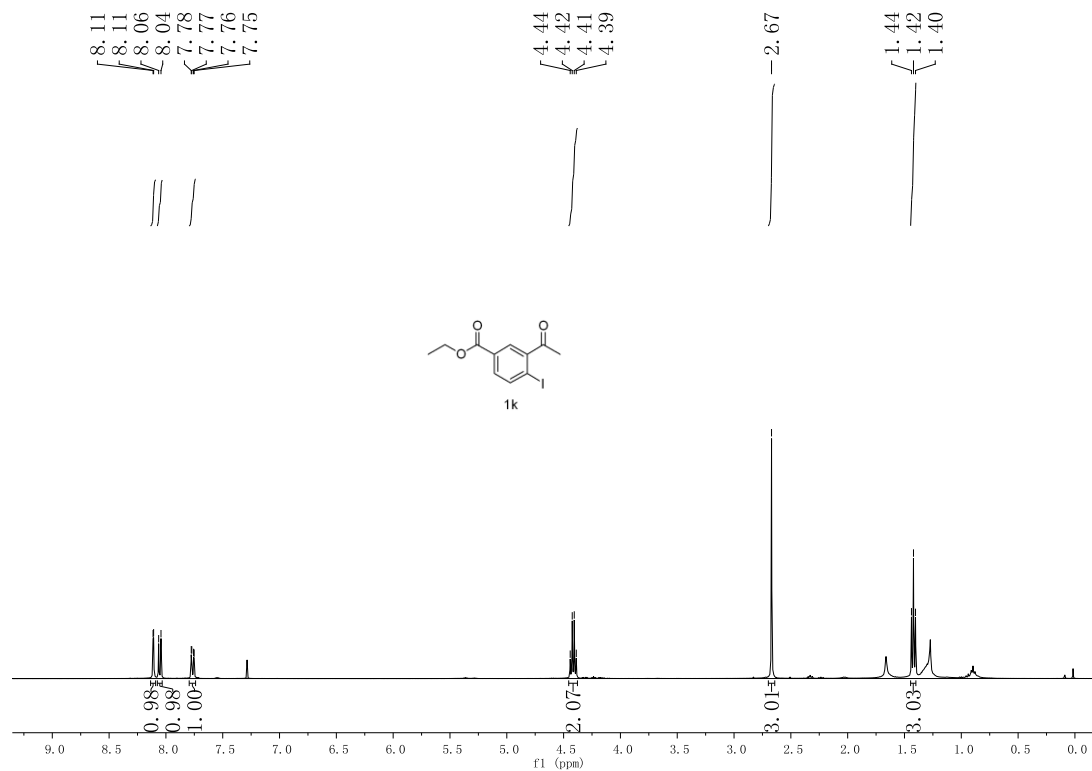

-200.92

-165.35

144.09

141.31

132.12

130.63

128.96

-97.05

-61.62

-29.42

-14.27

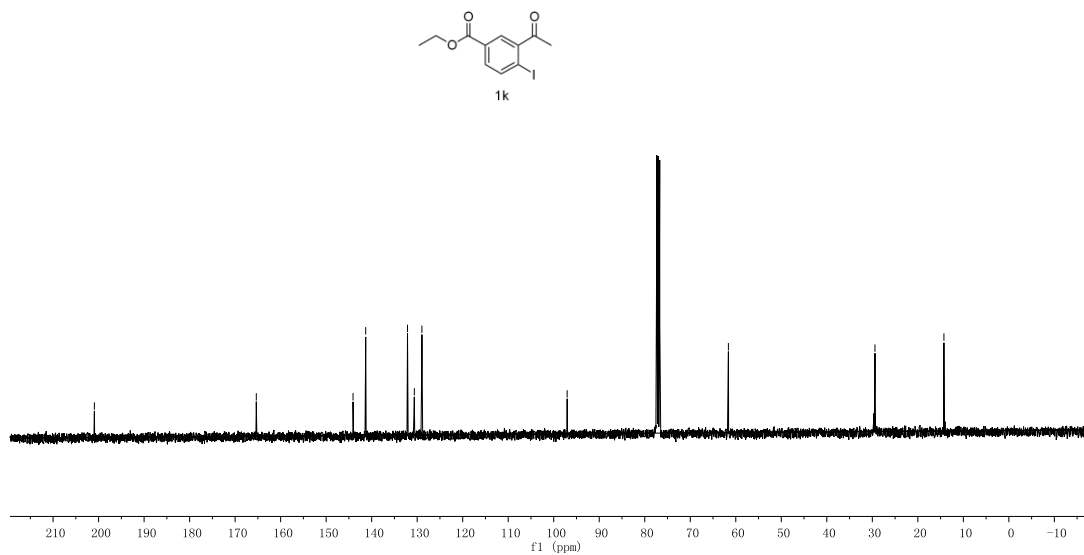

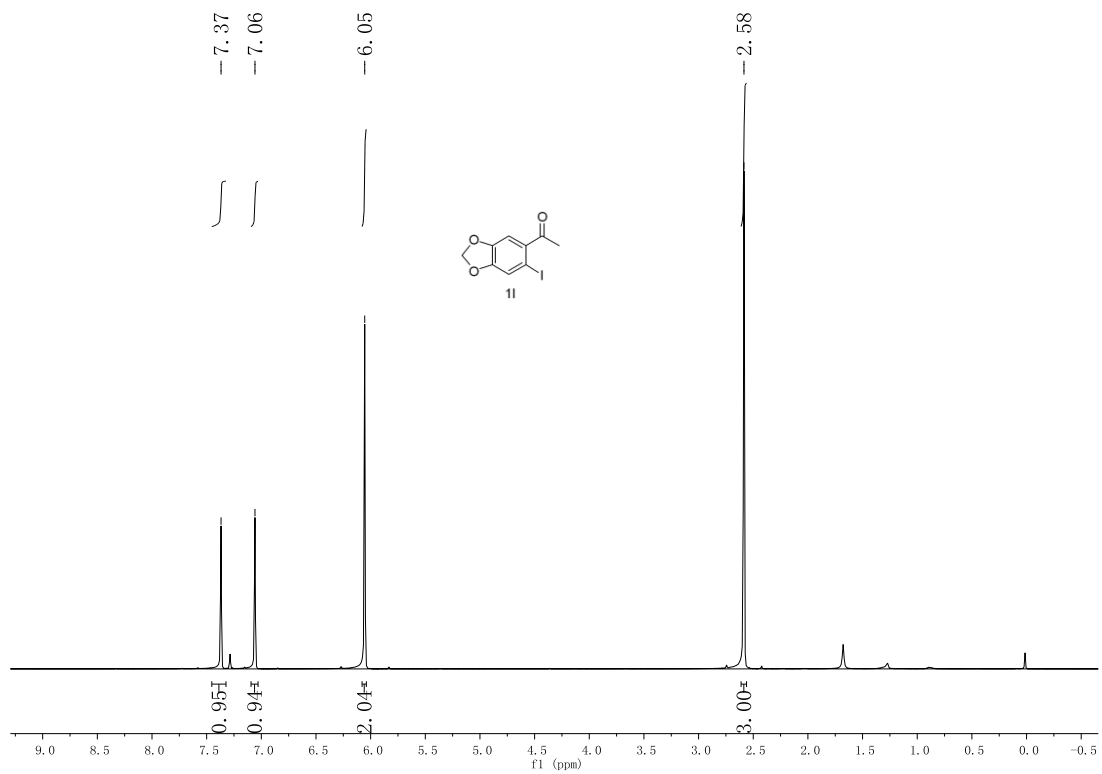

-199.58  
 ~150.36  
 ~148.24  
 -136.62  
 -120.66  
 -109.19  
 -102.35  
 -81.36  
 -29.24

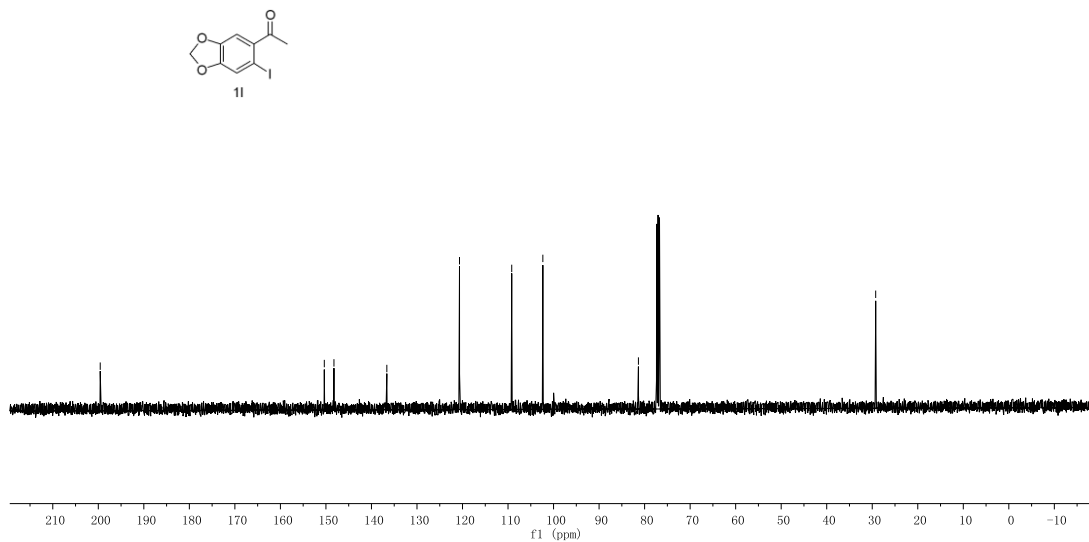

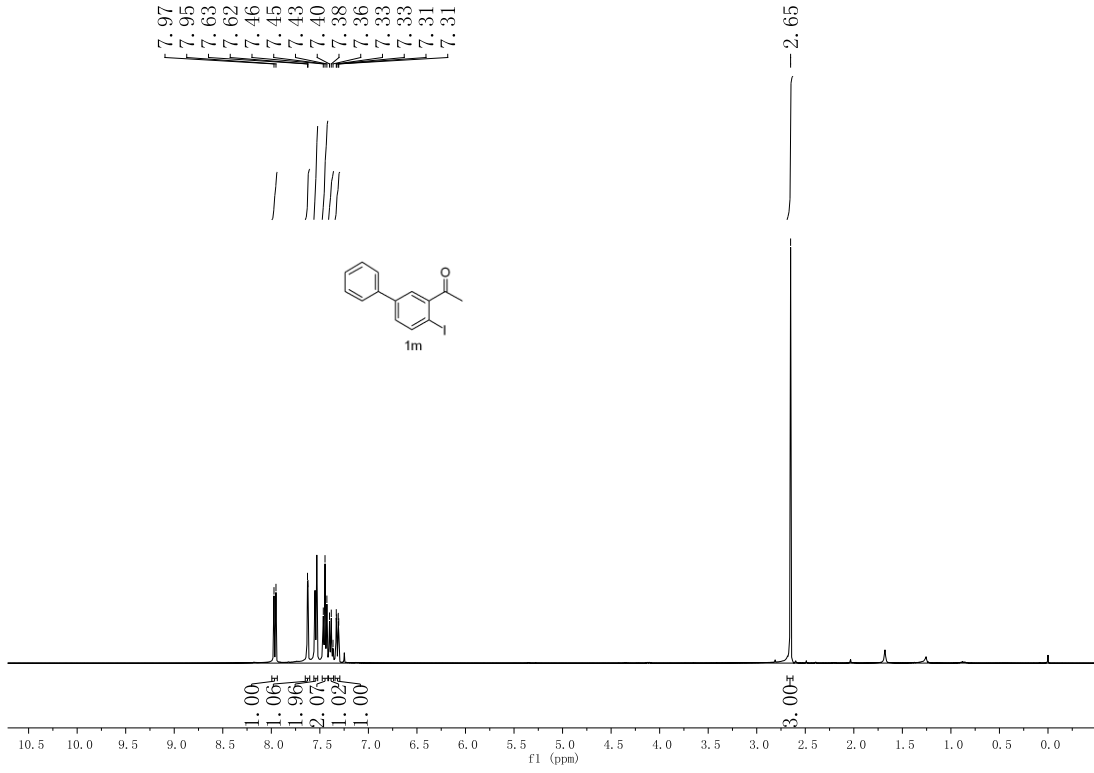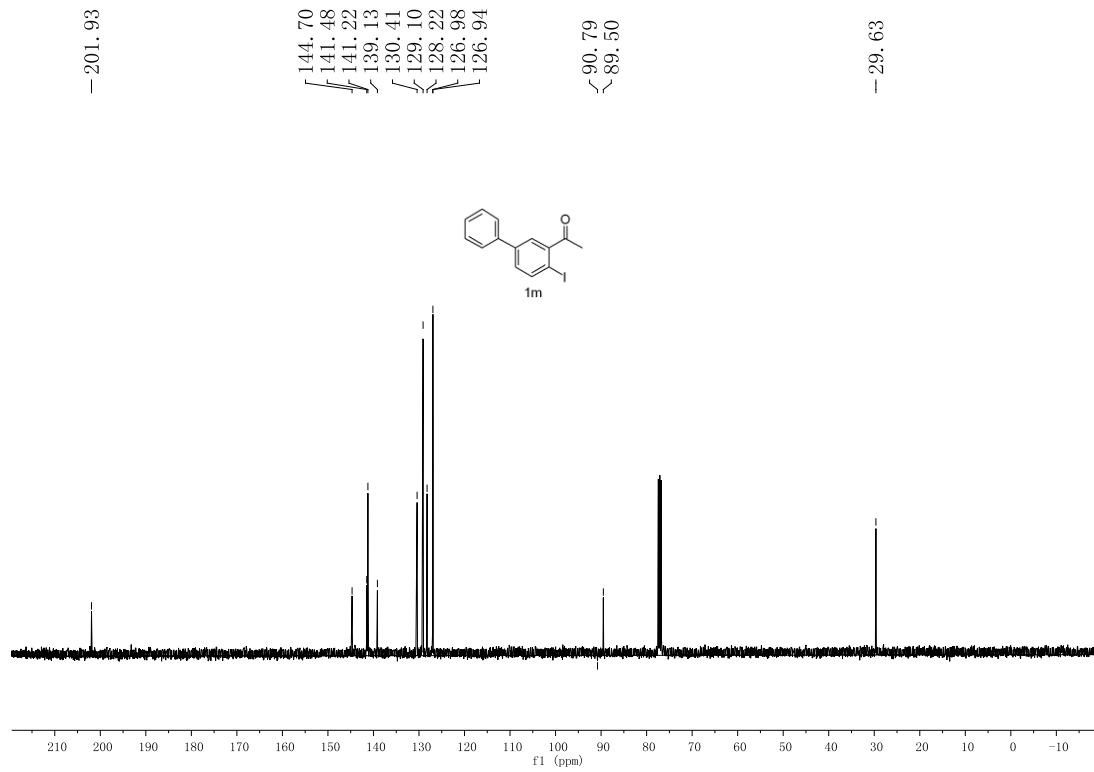

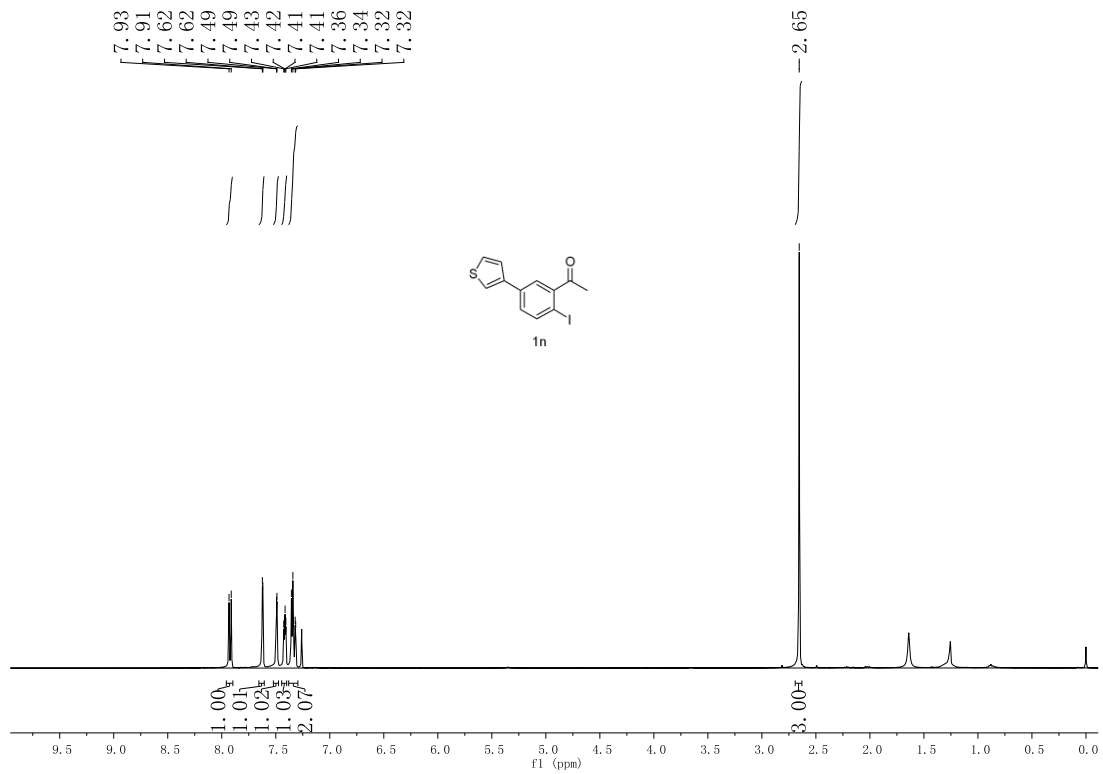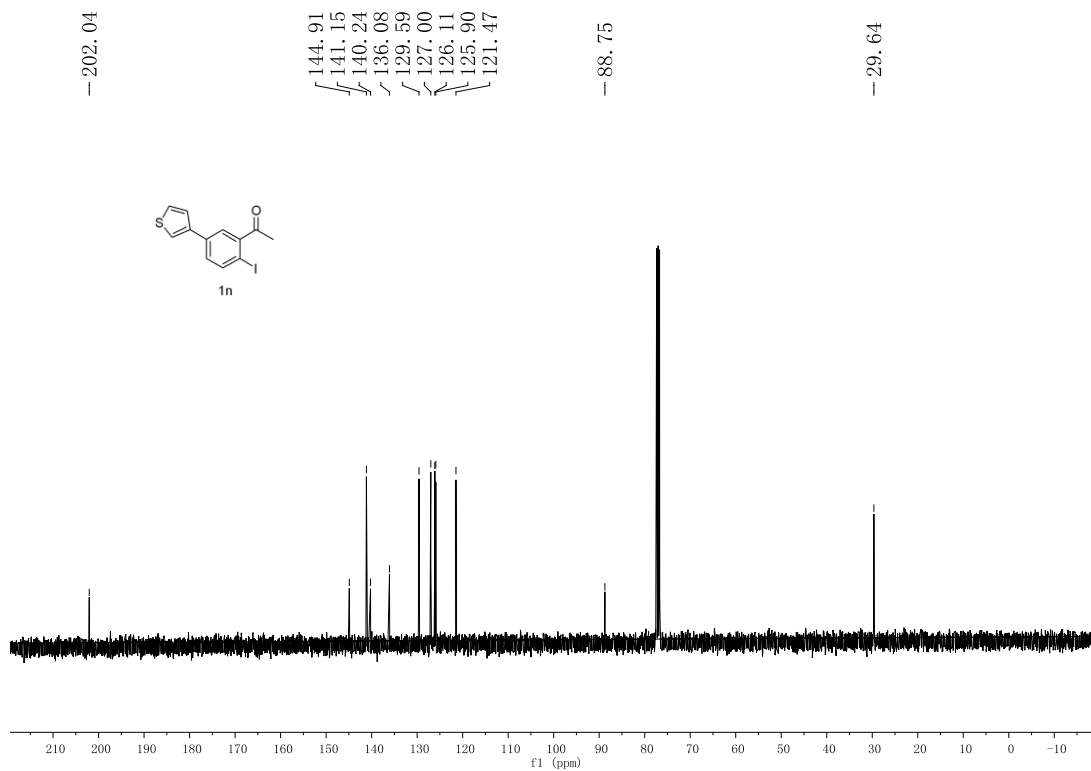

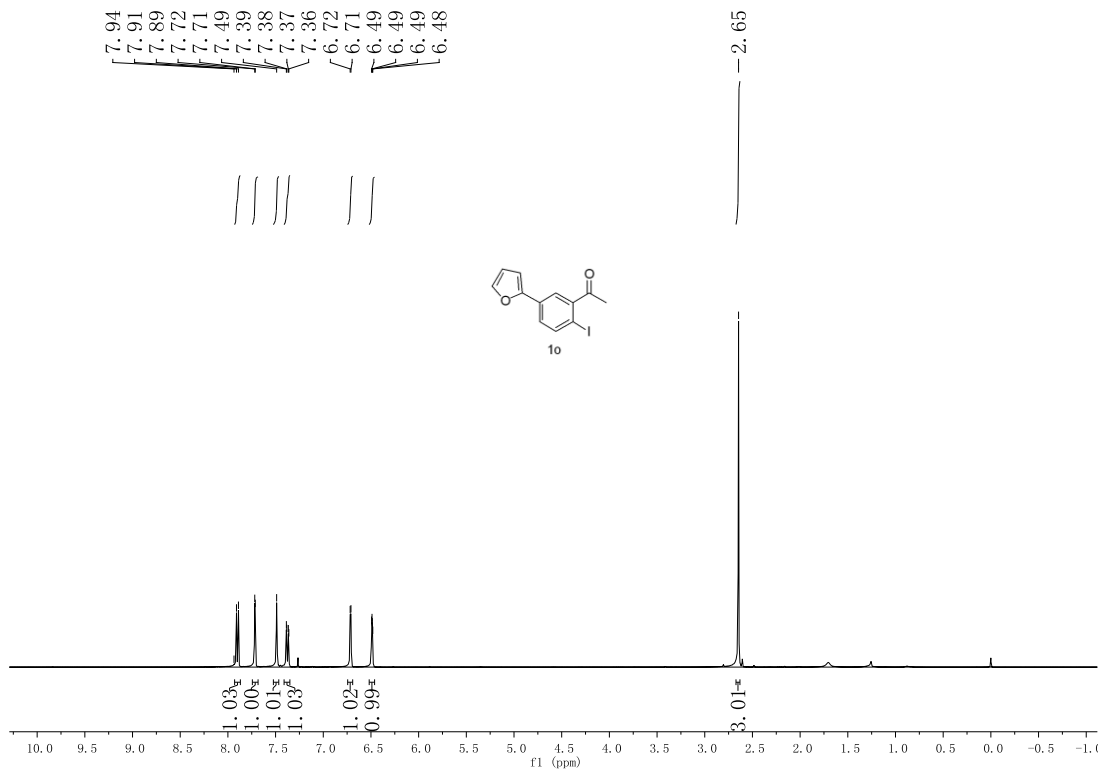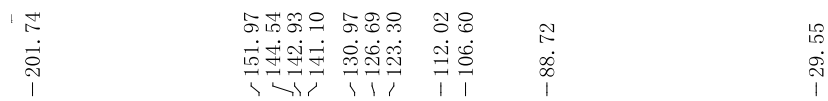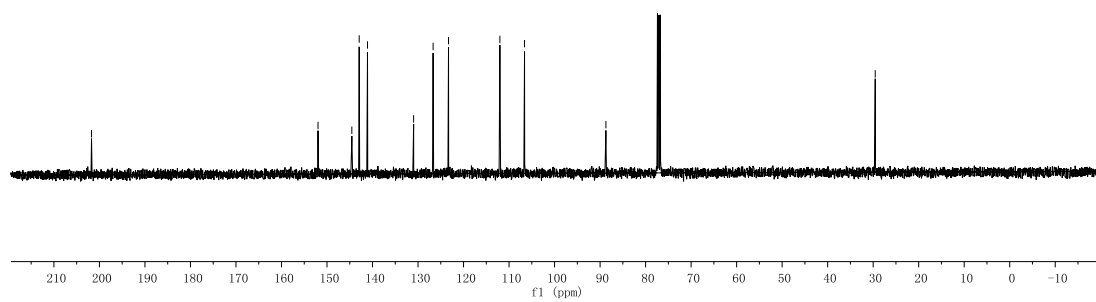

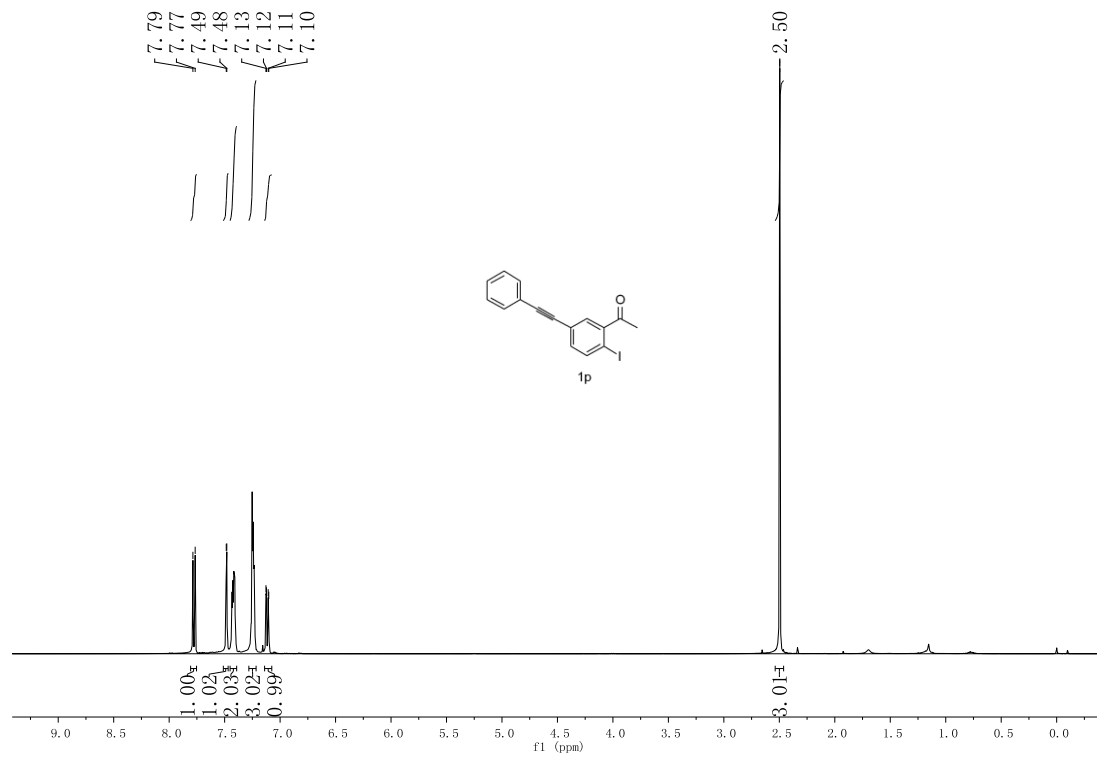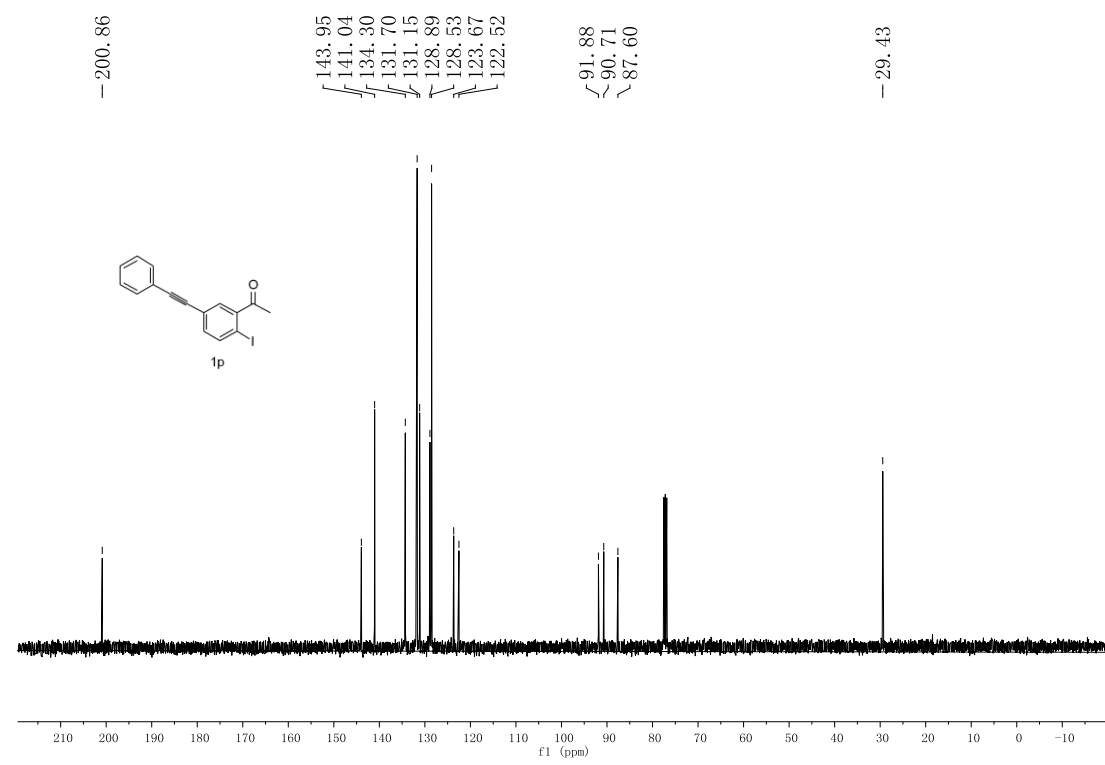

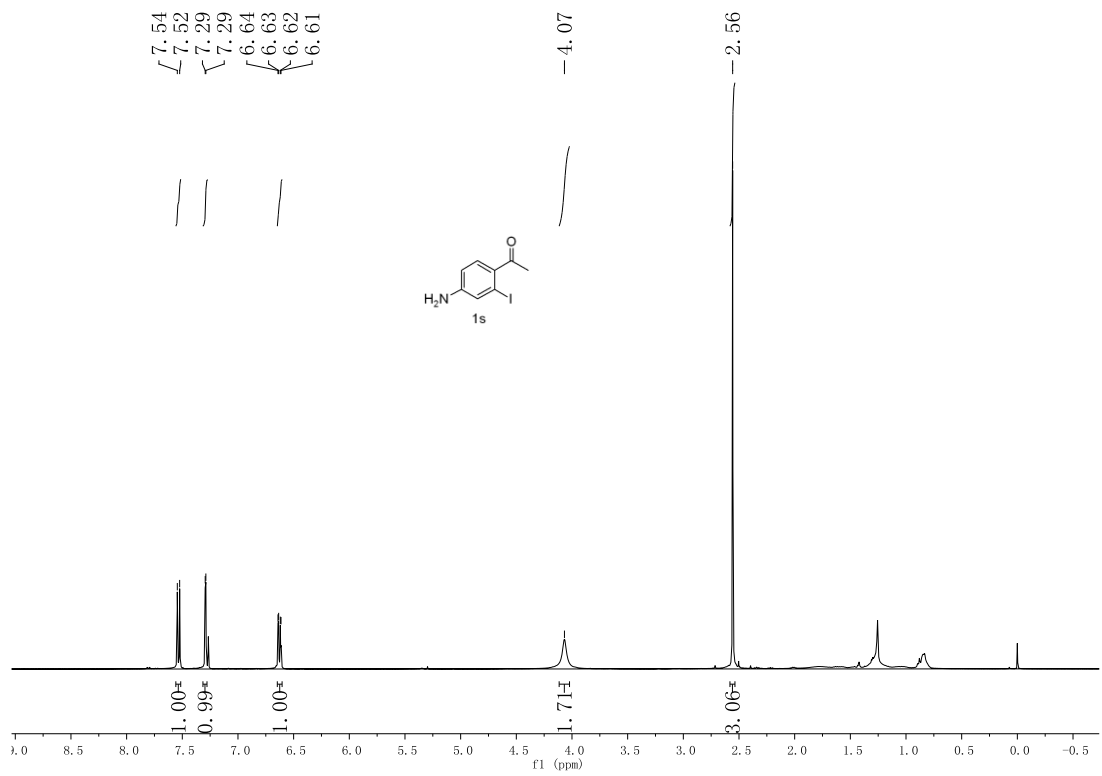

-197.56

-150.23

132.14  
130.03  
127.52

-113.21

-94.17

-28.31

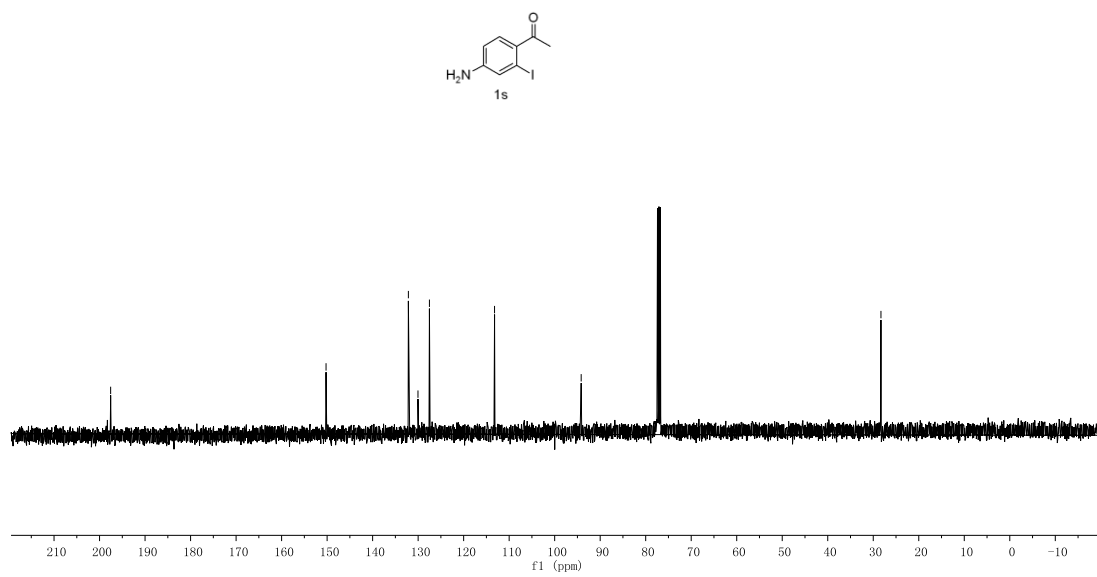

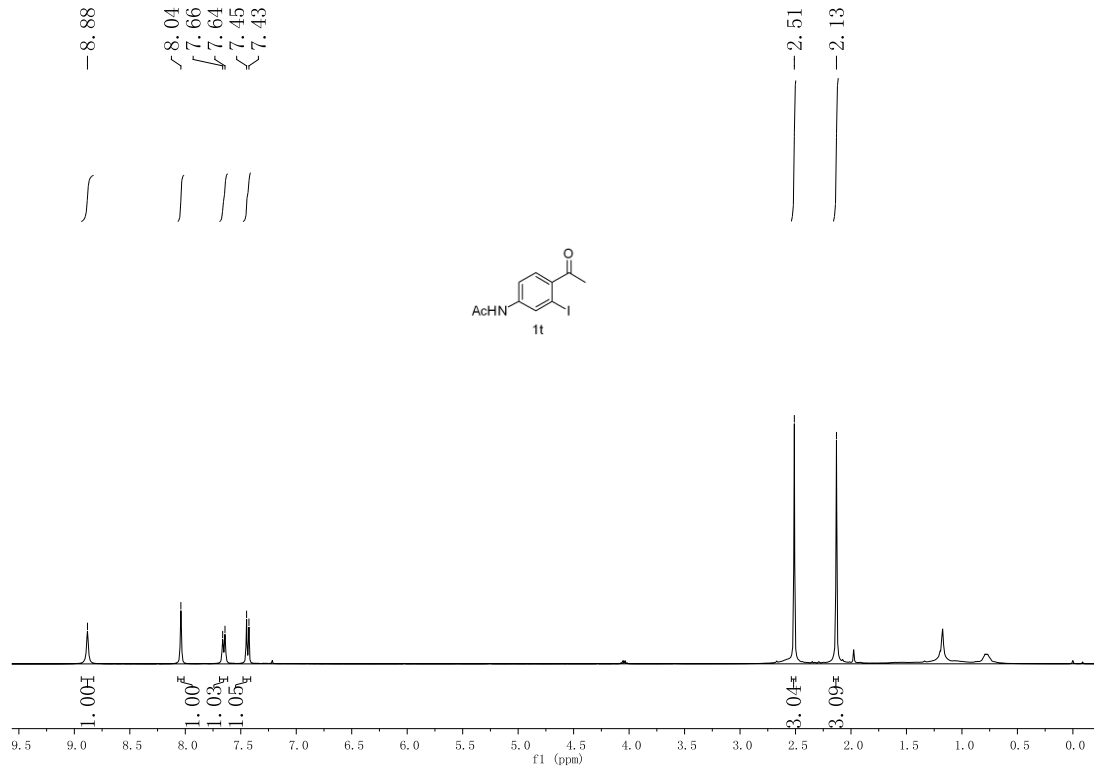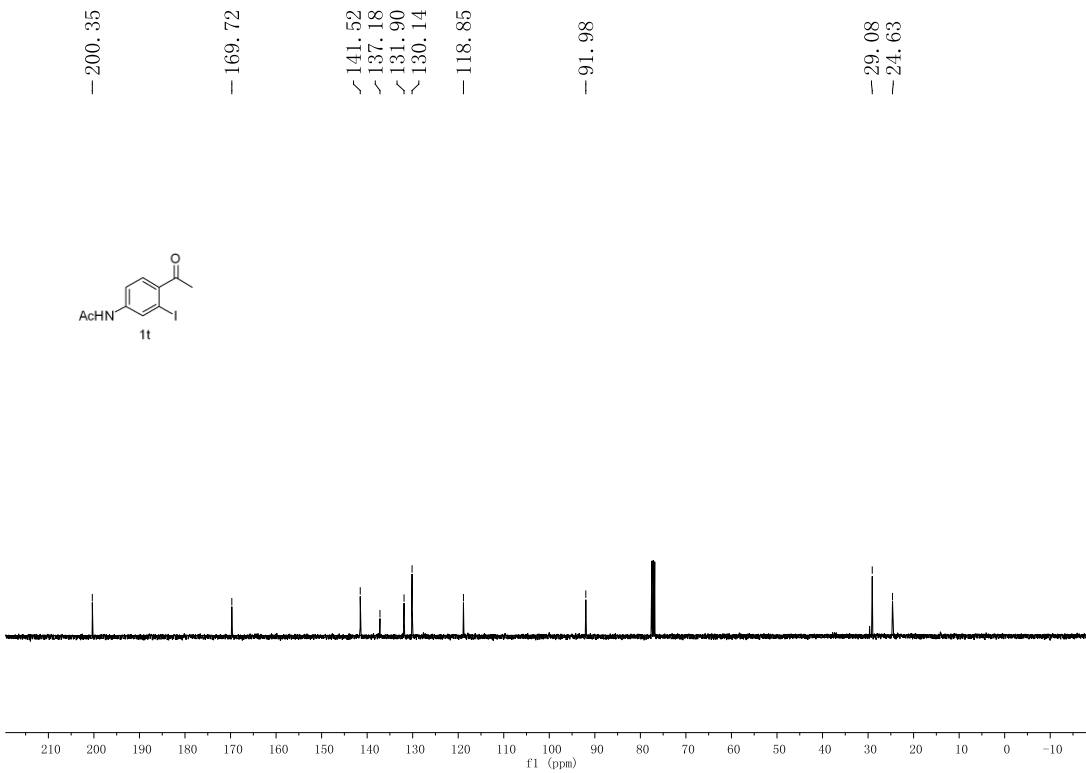



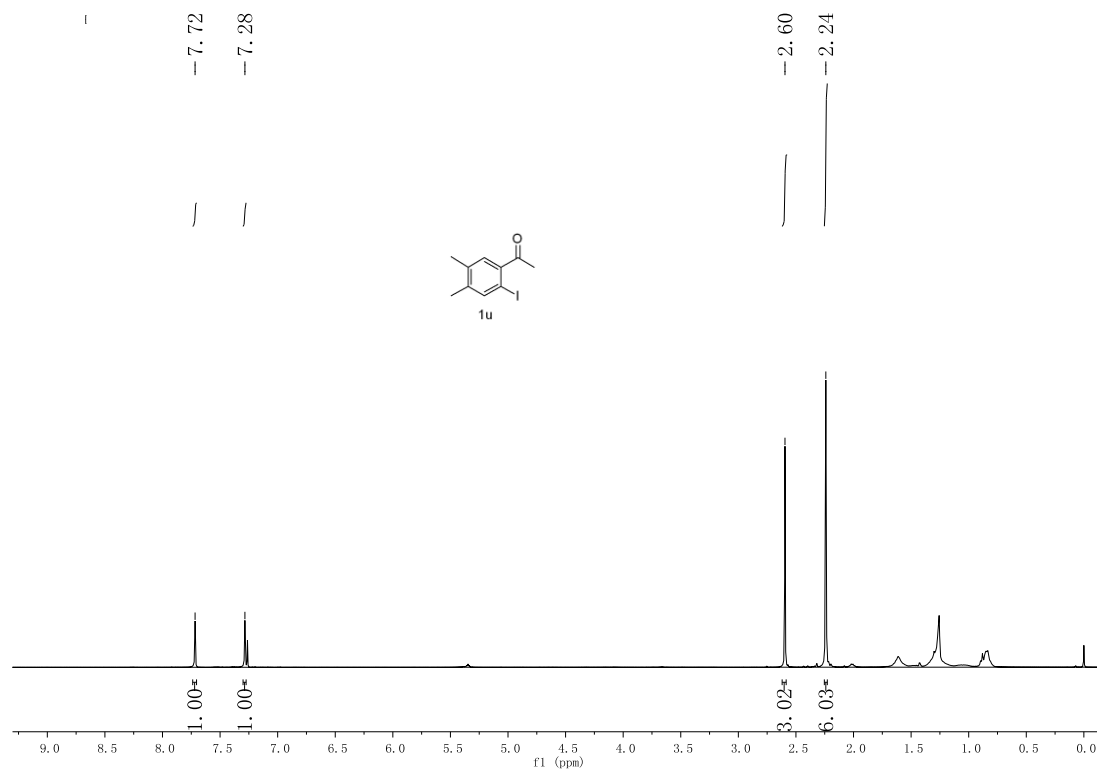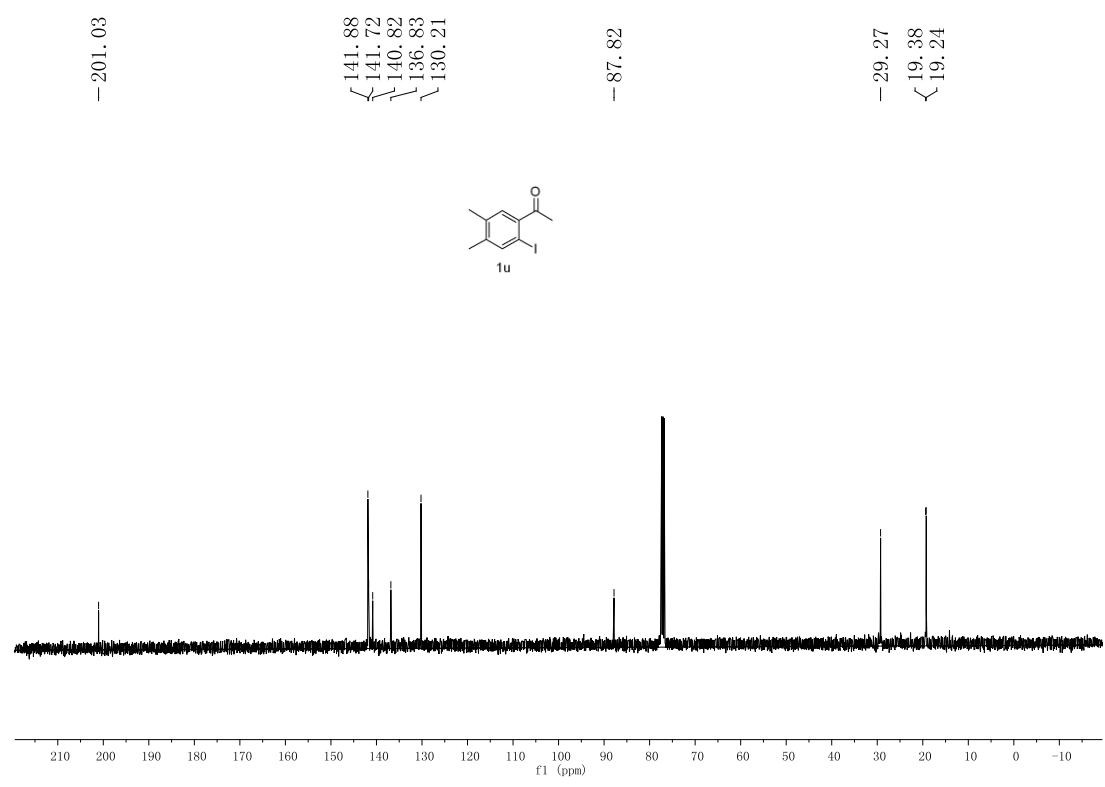

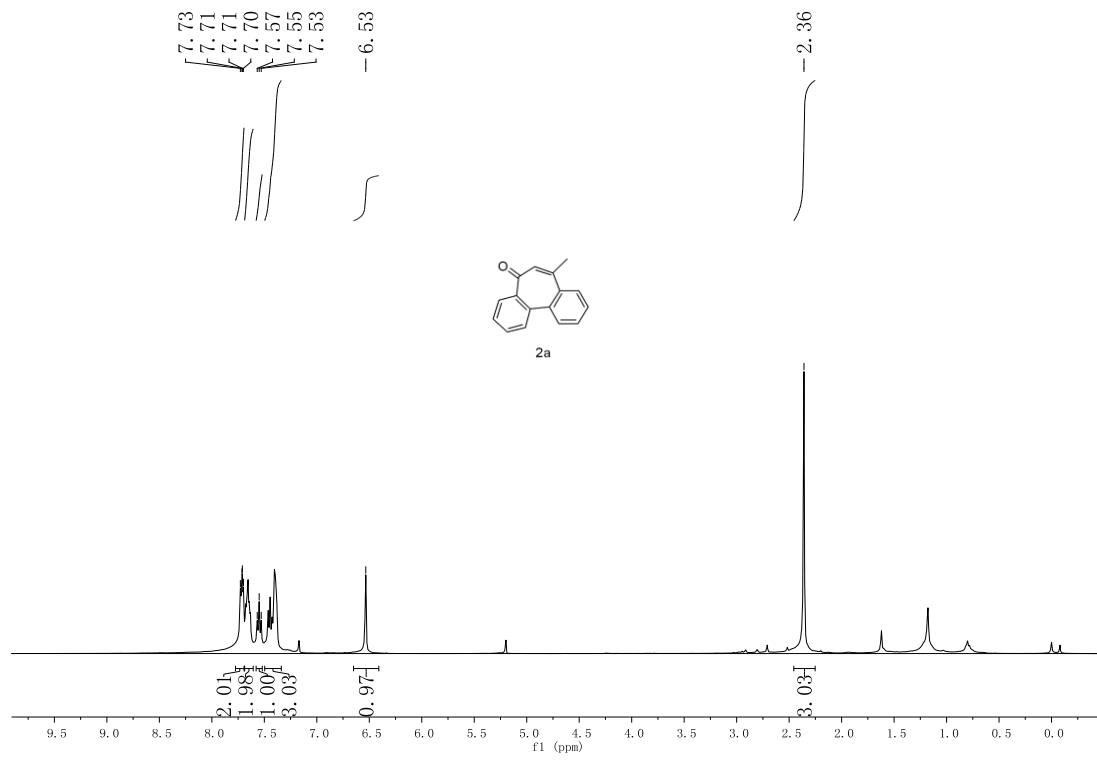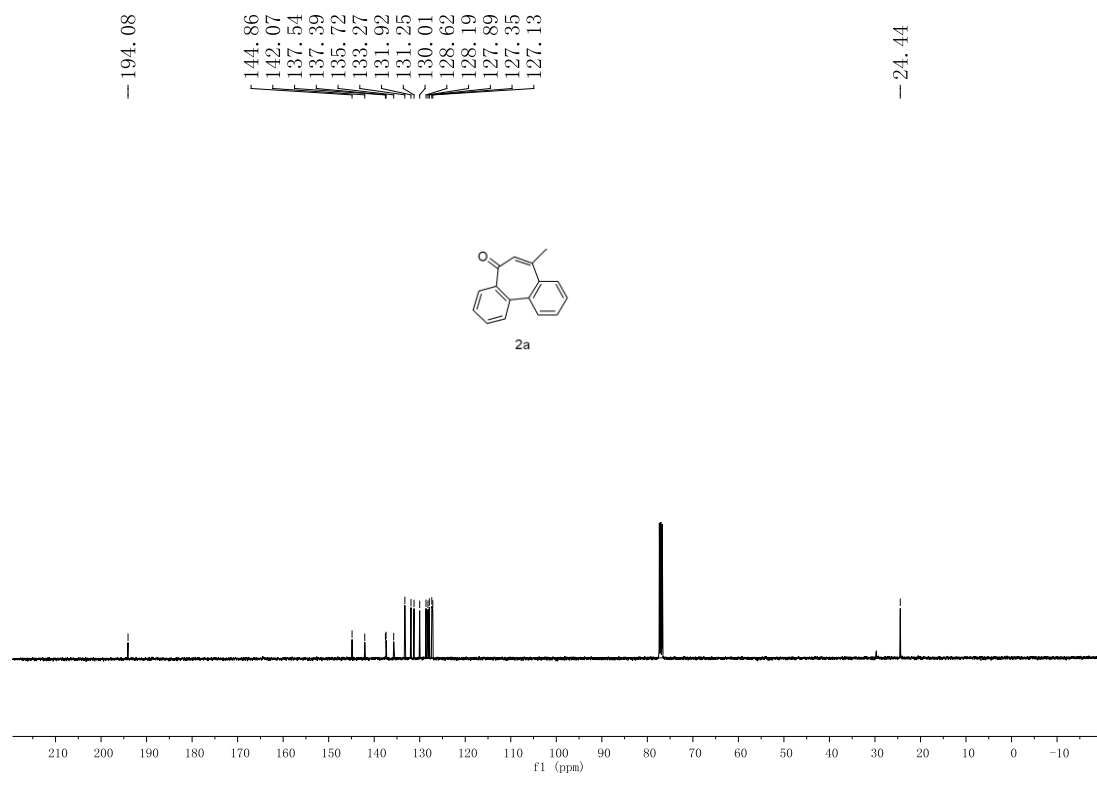

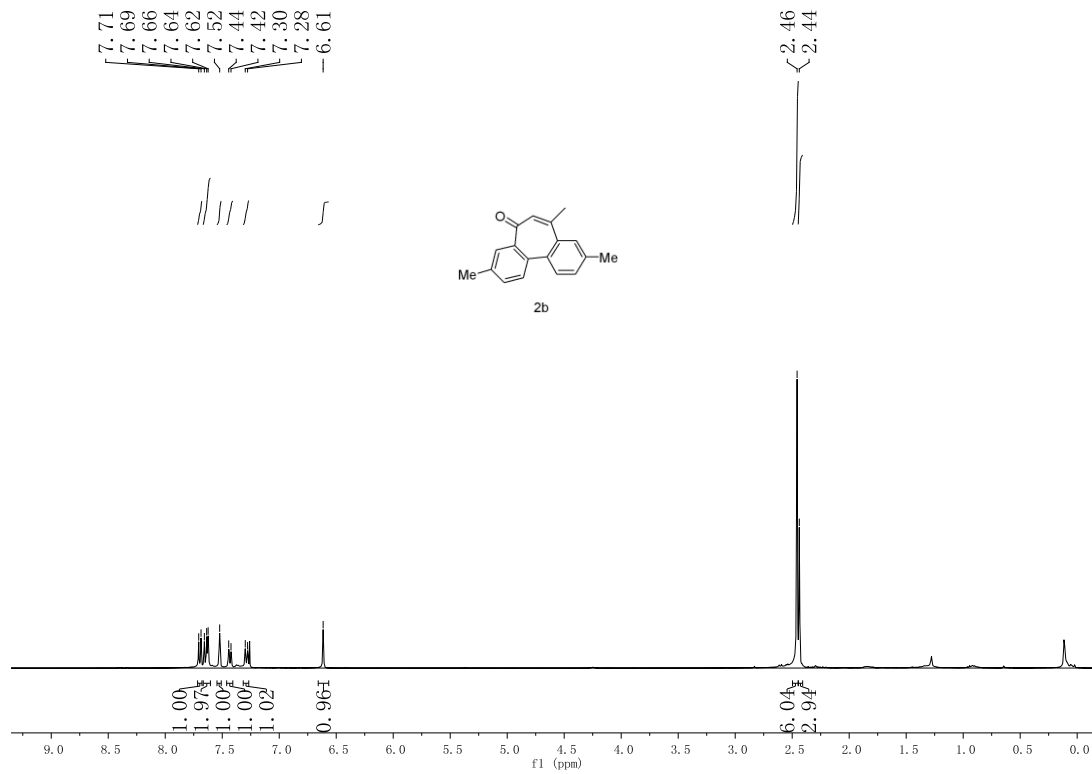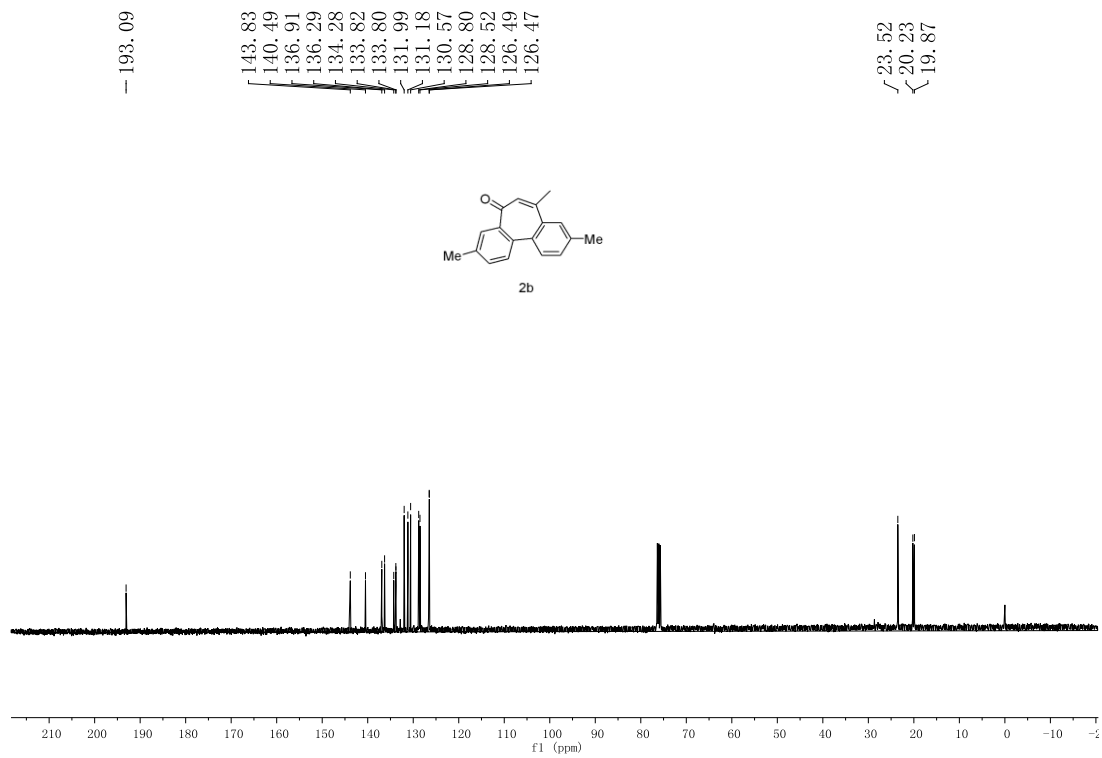

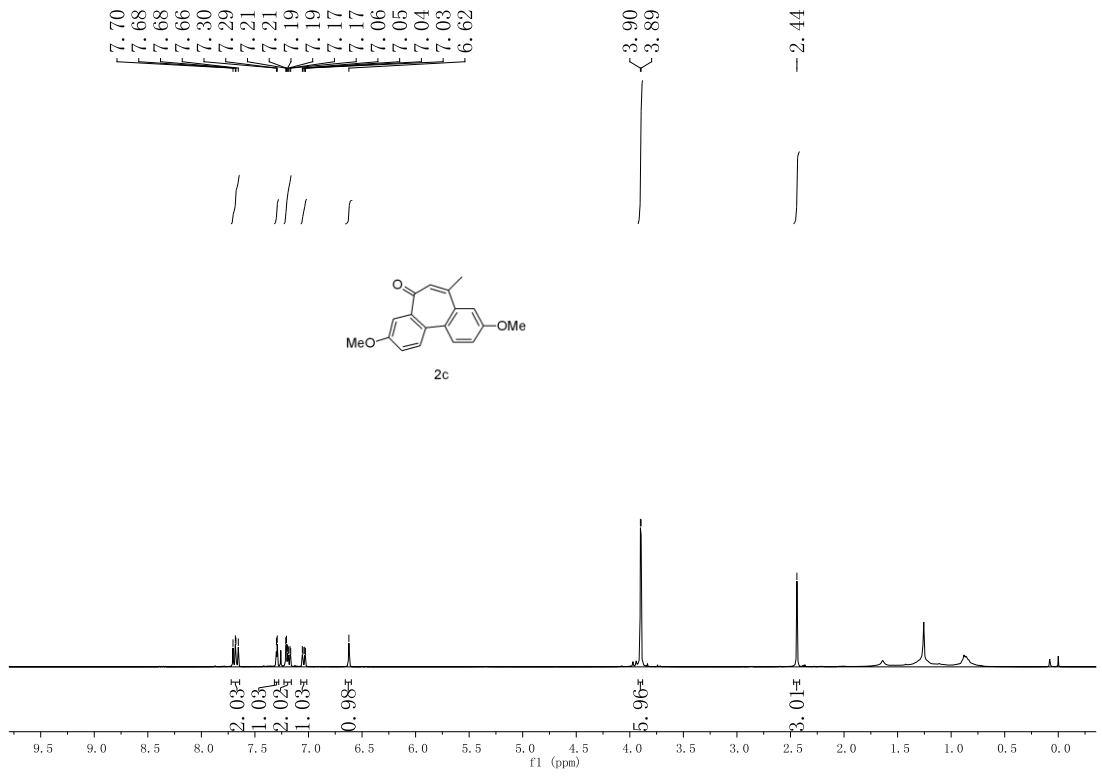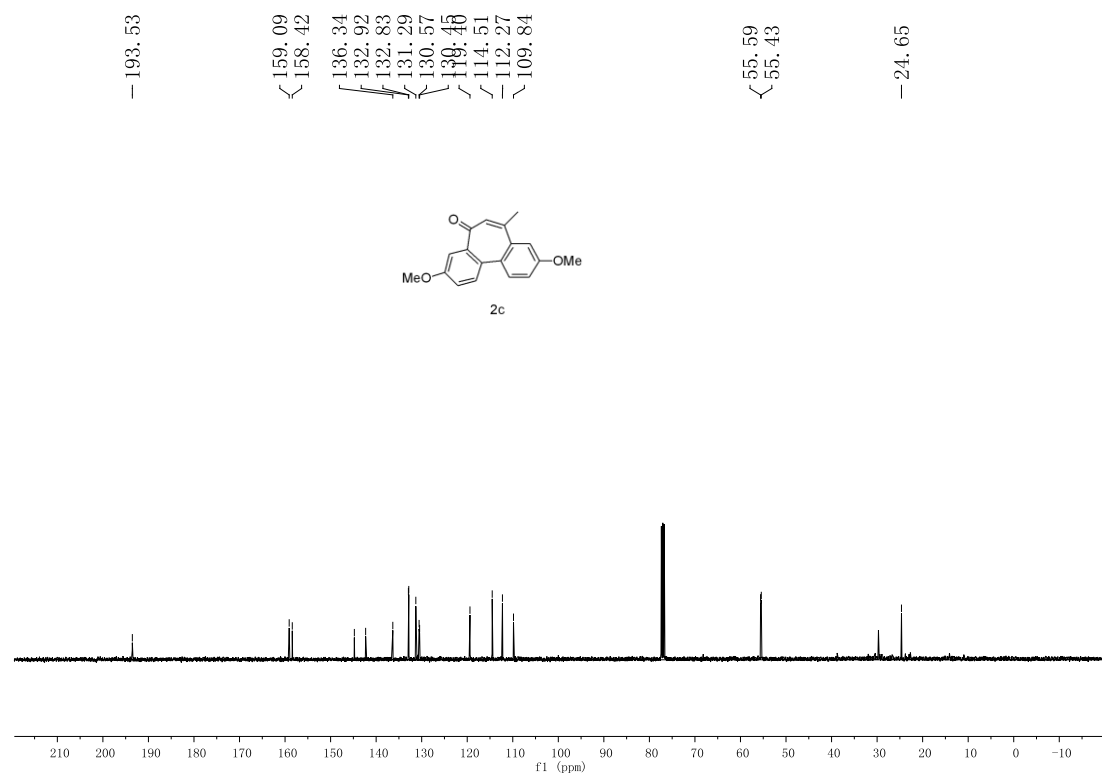

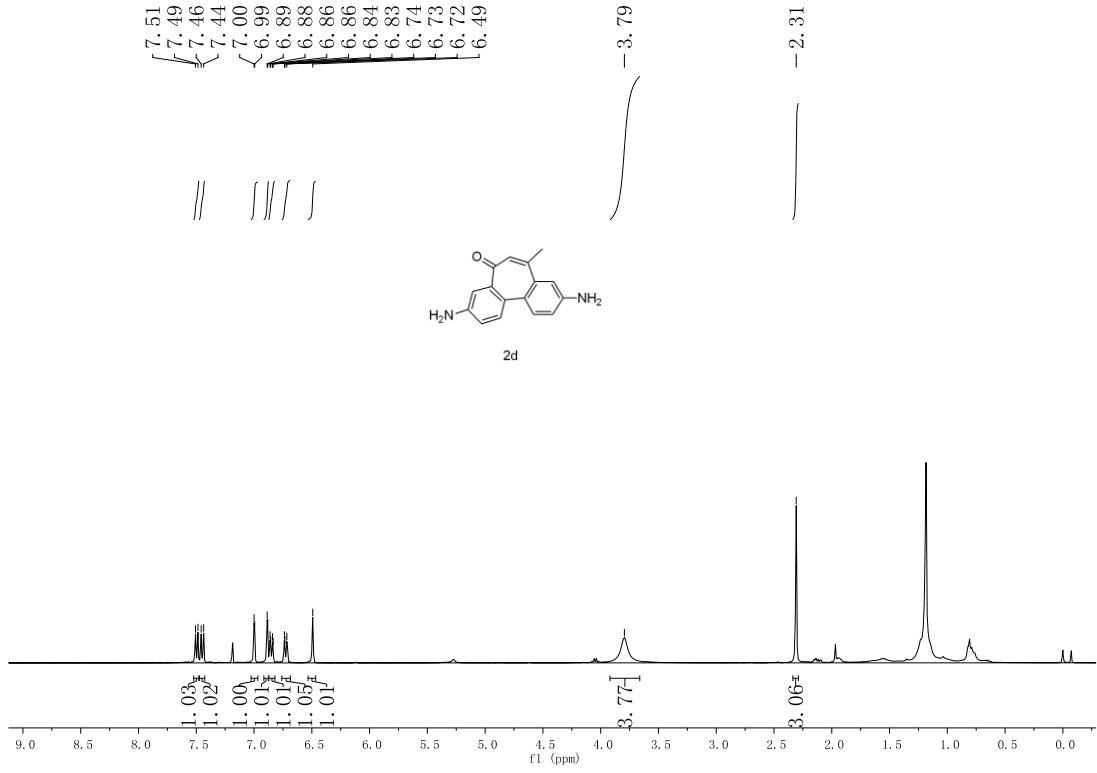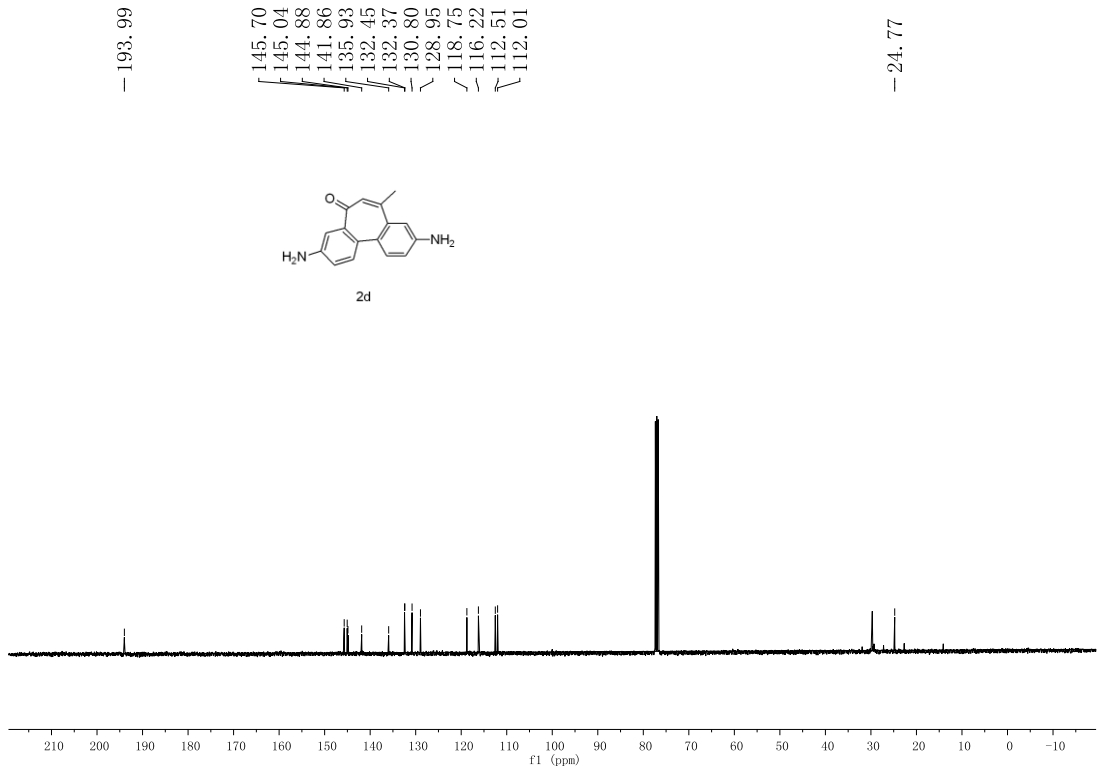

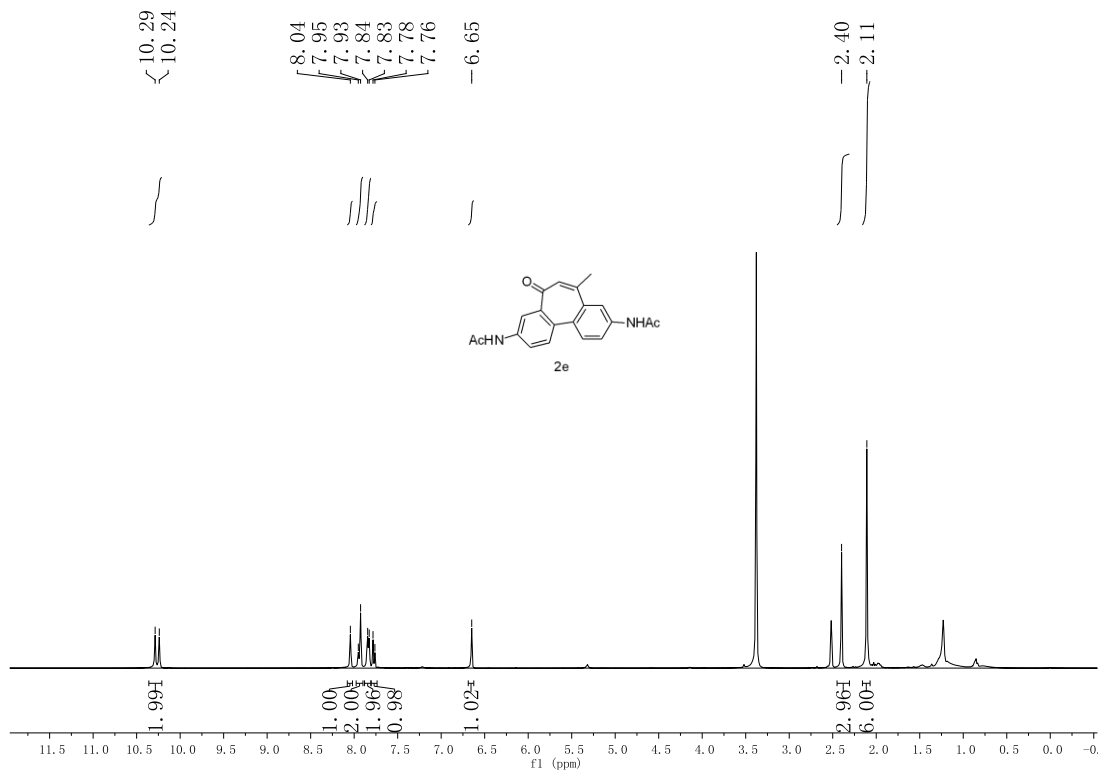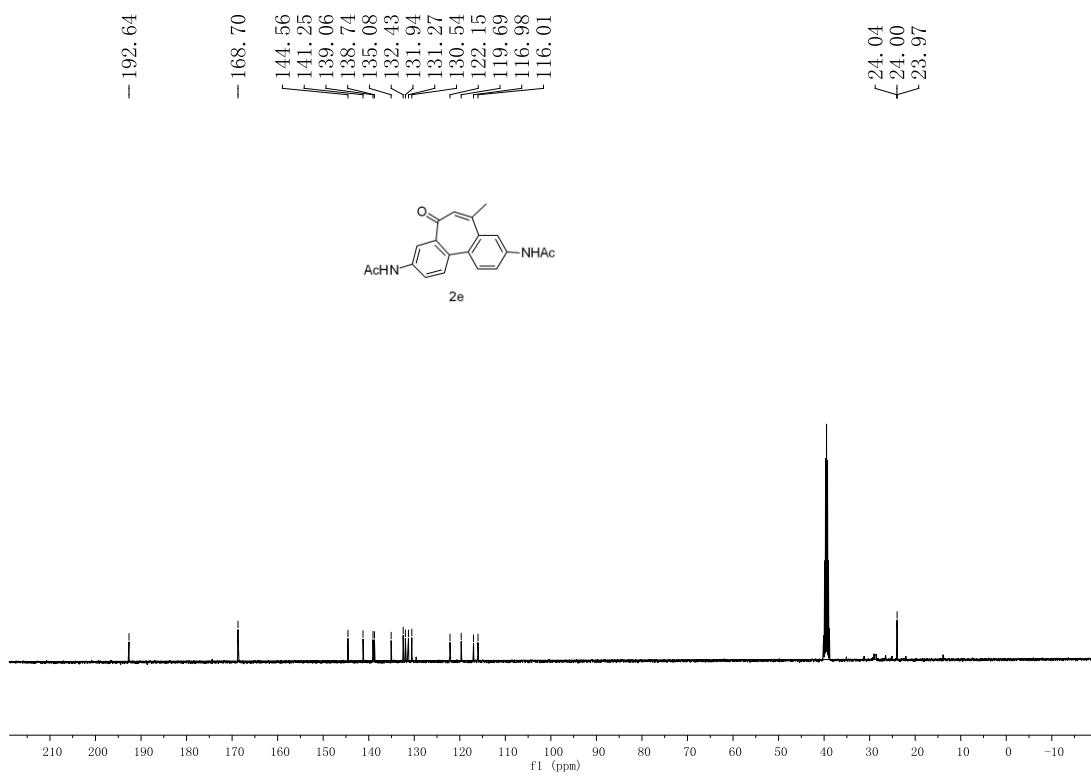

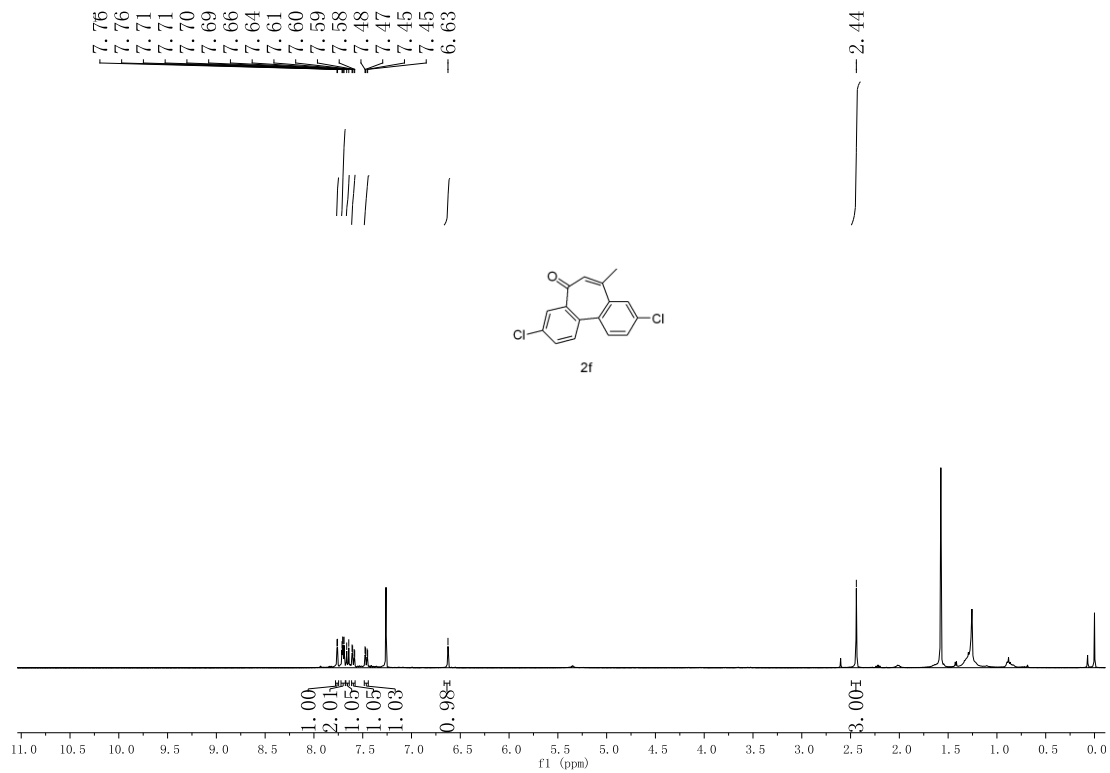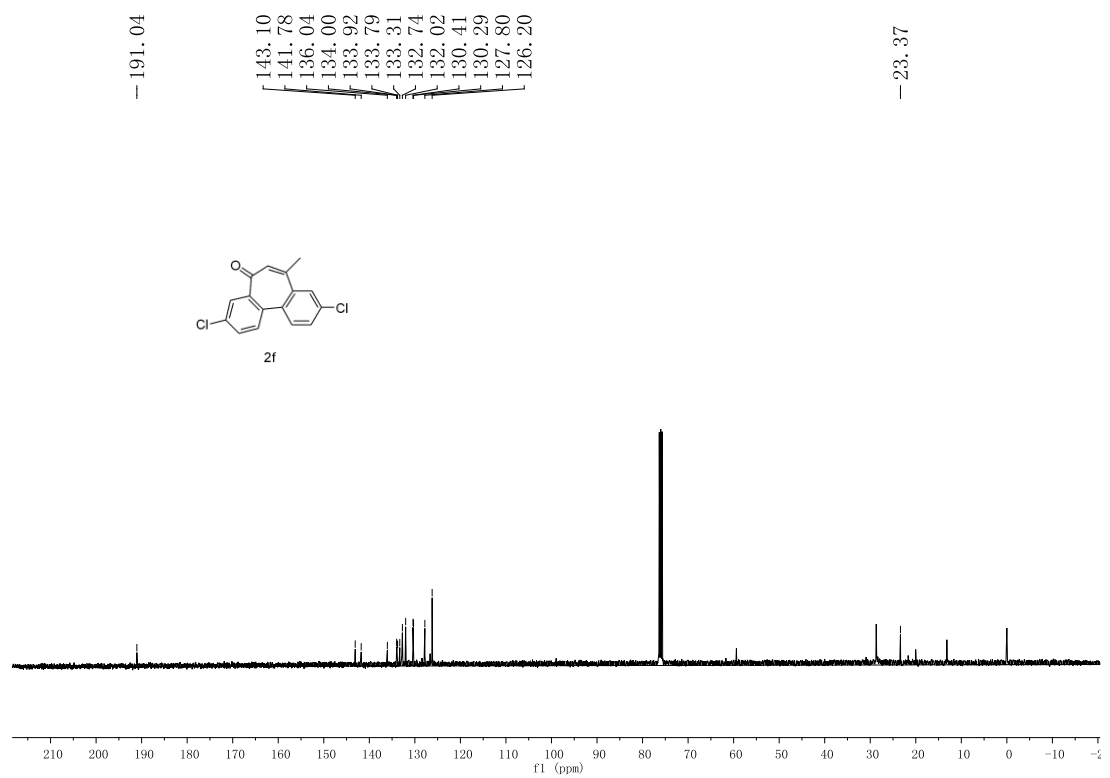

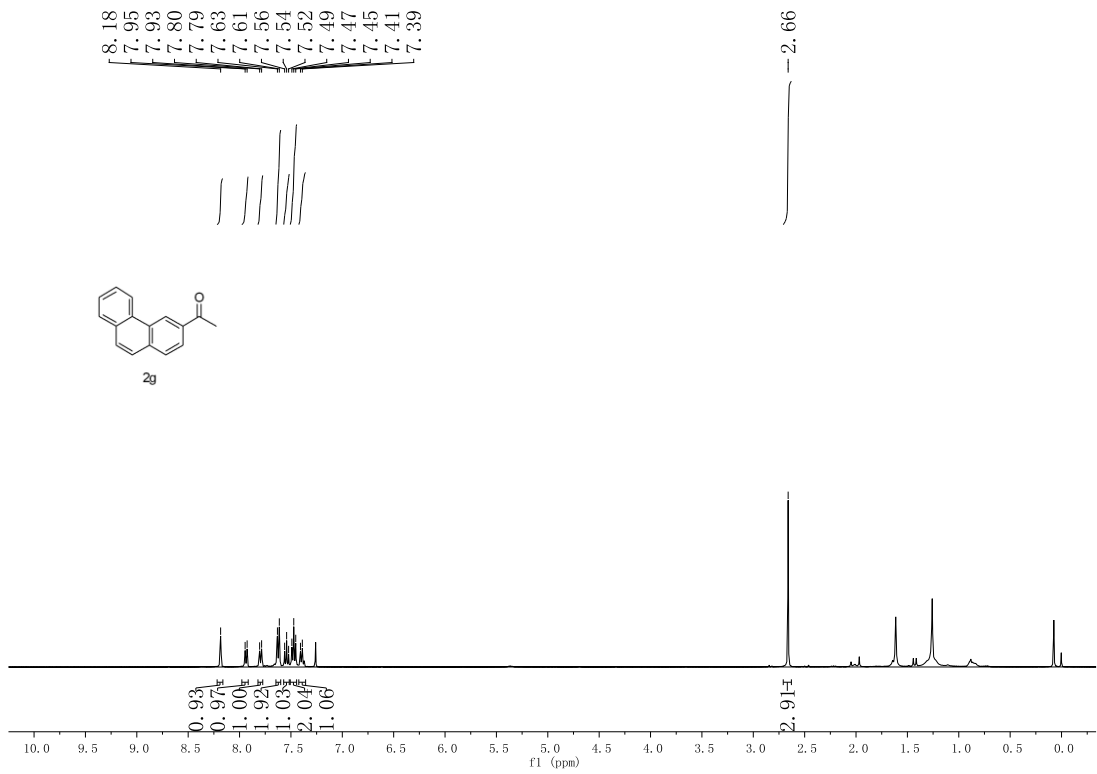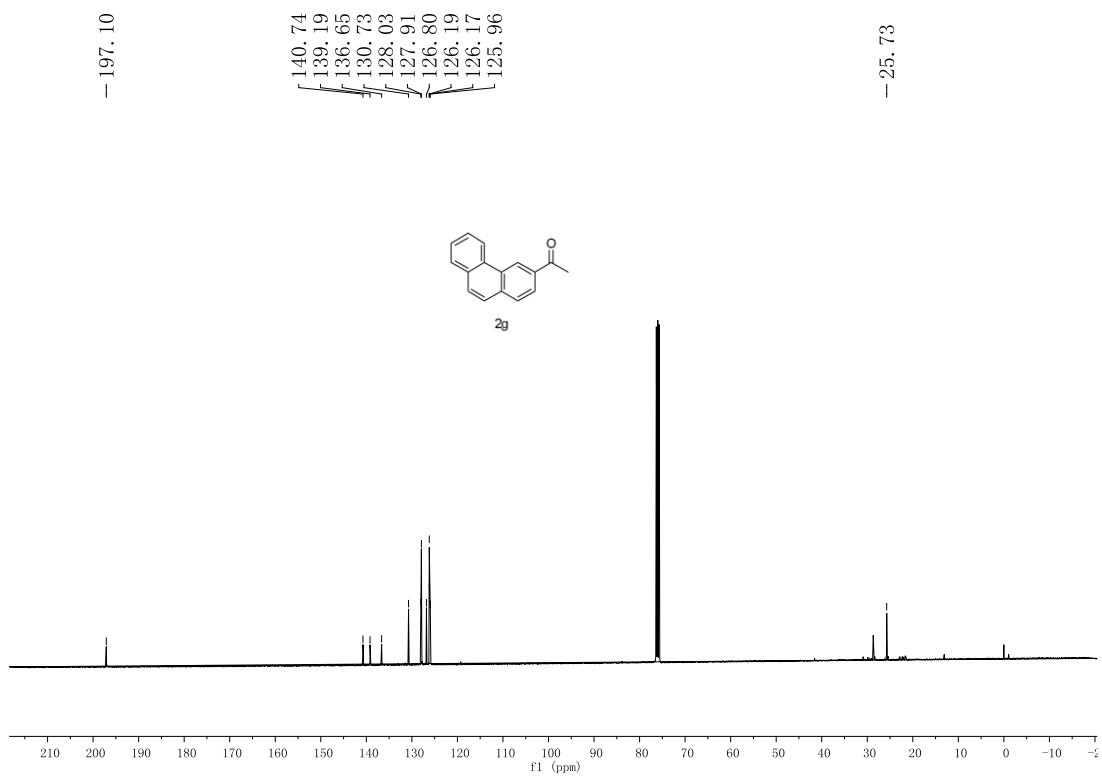



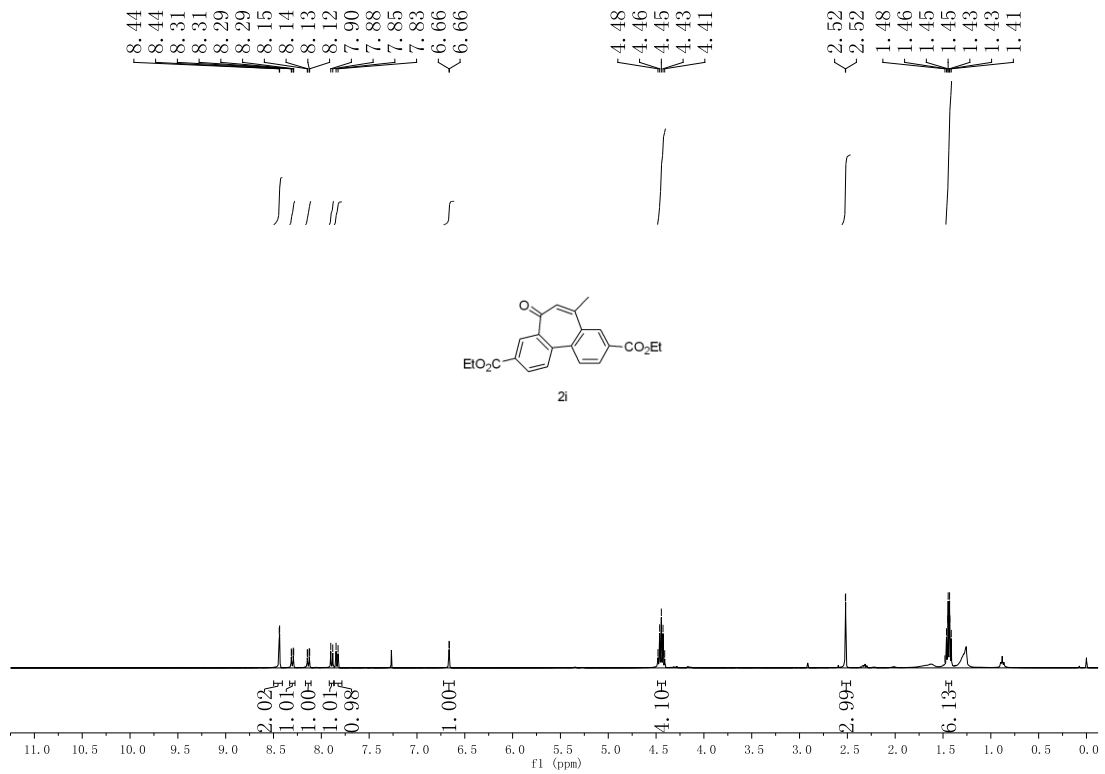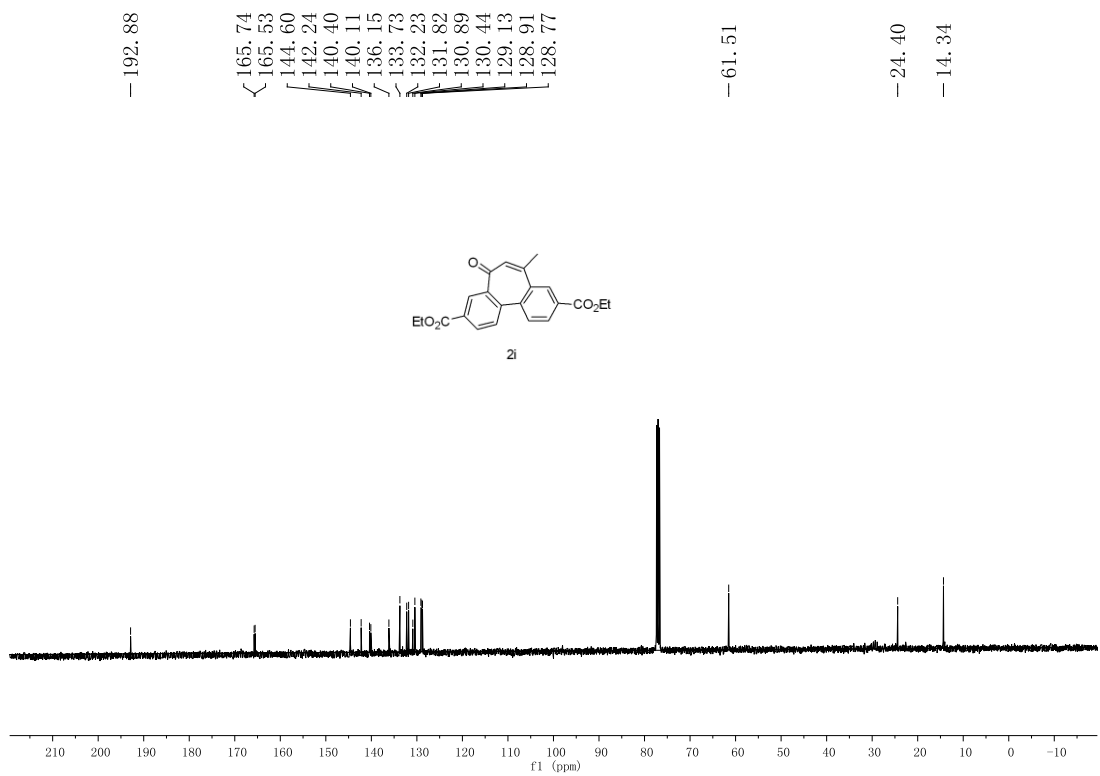

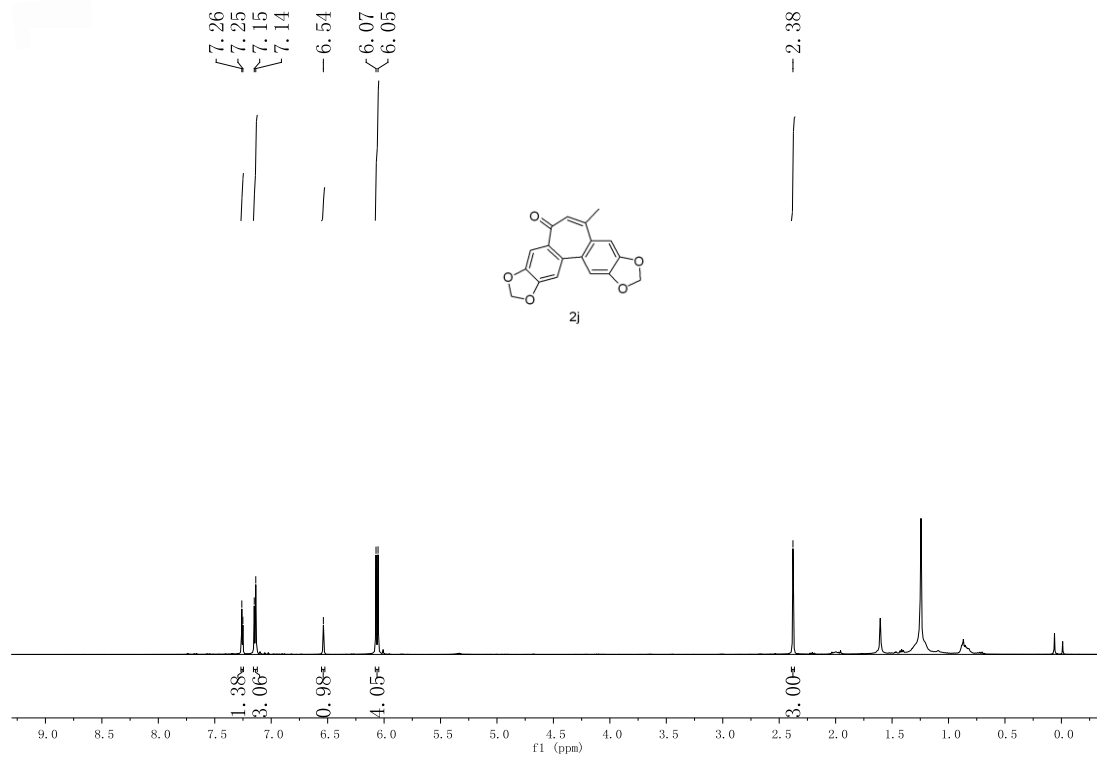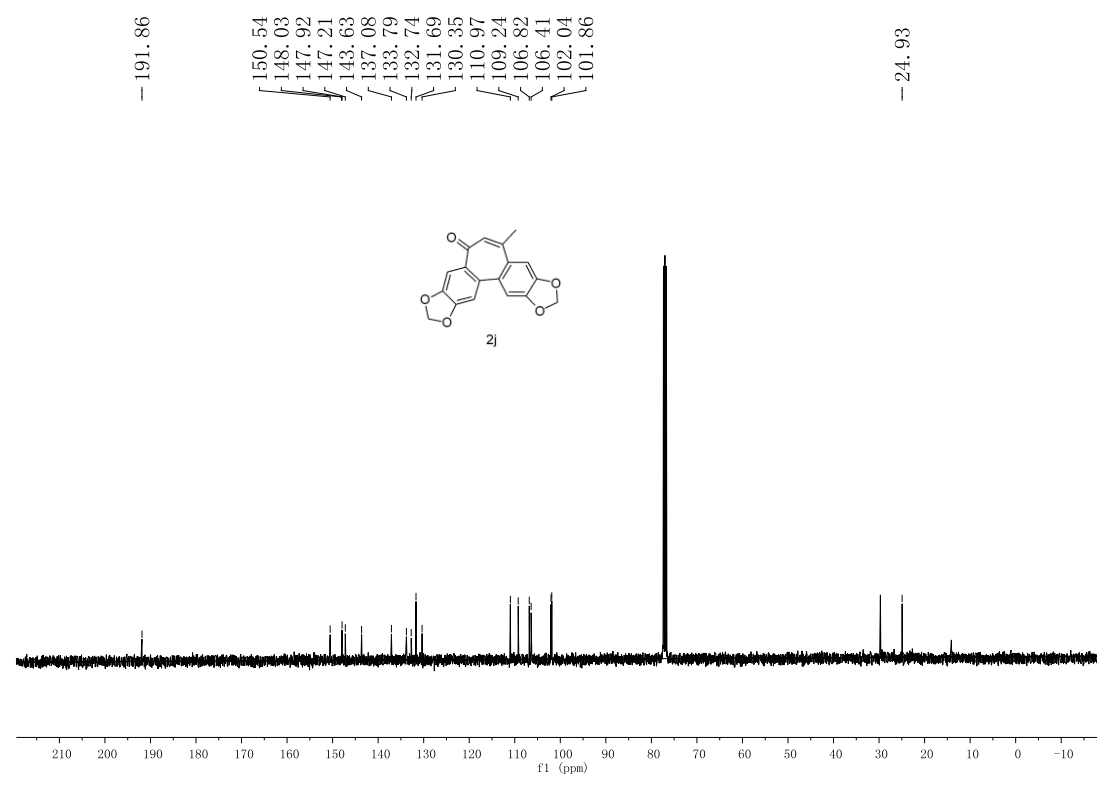

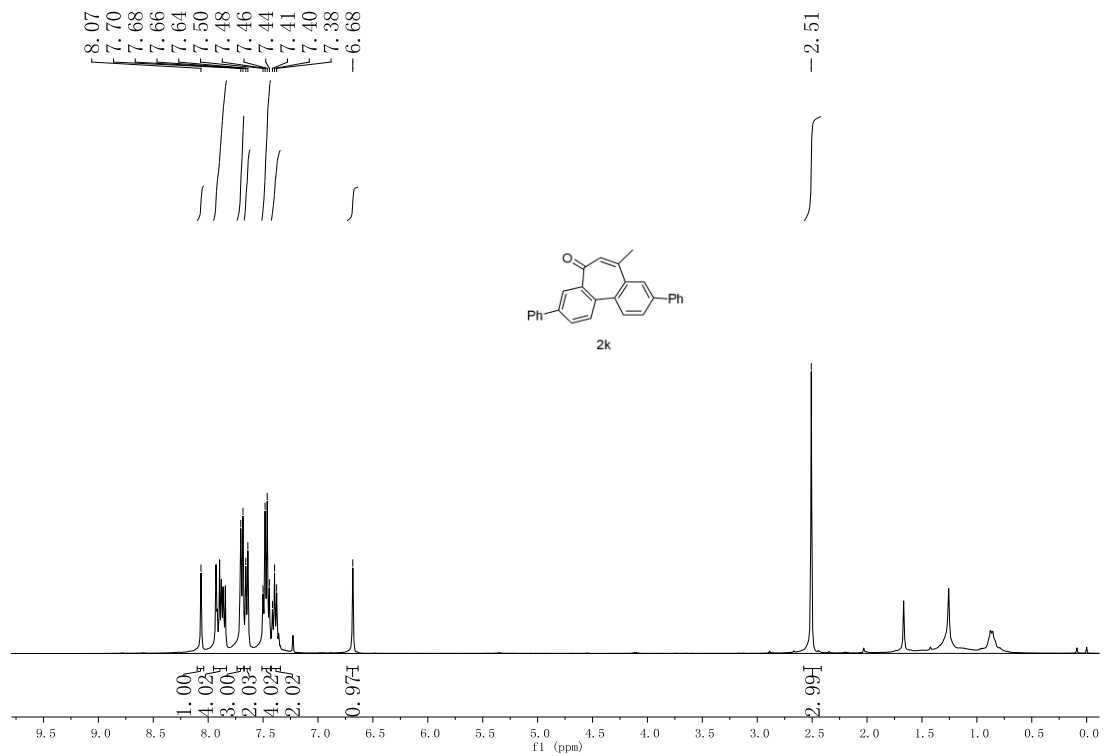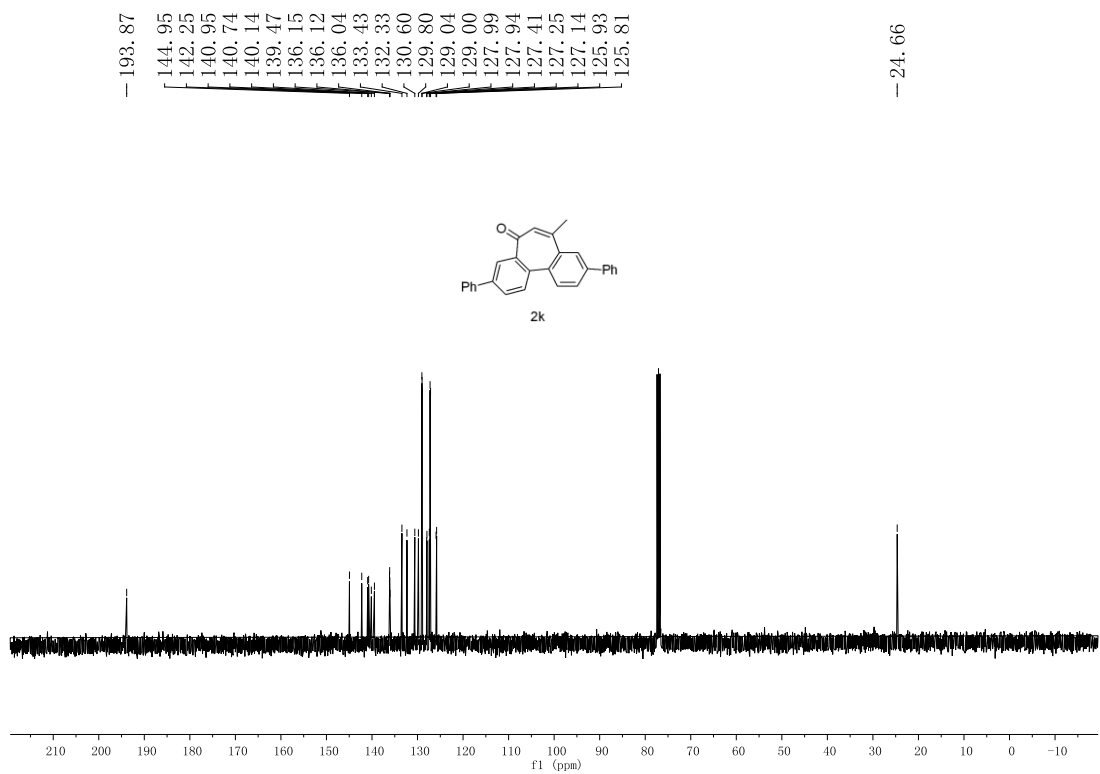

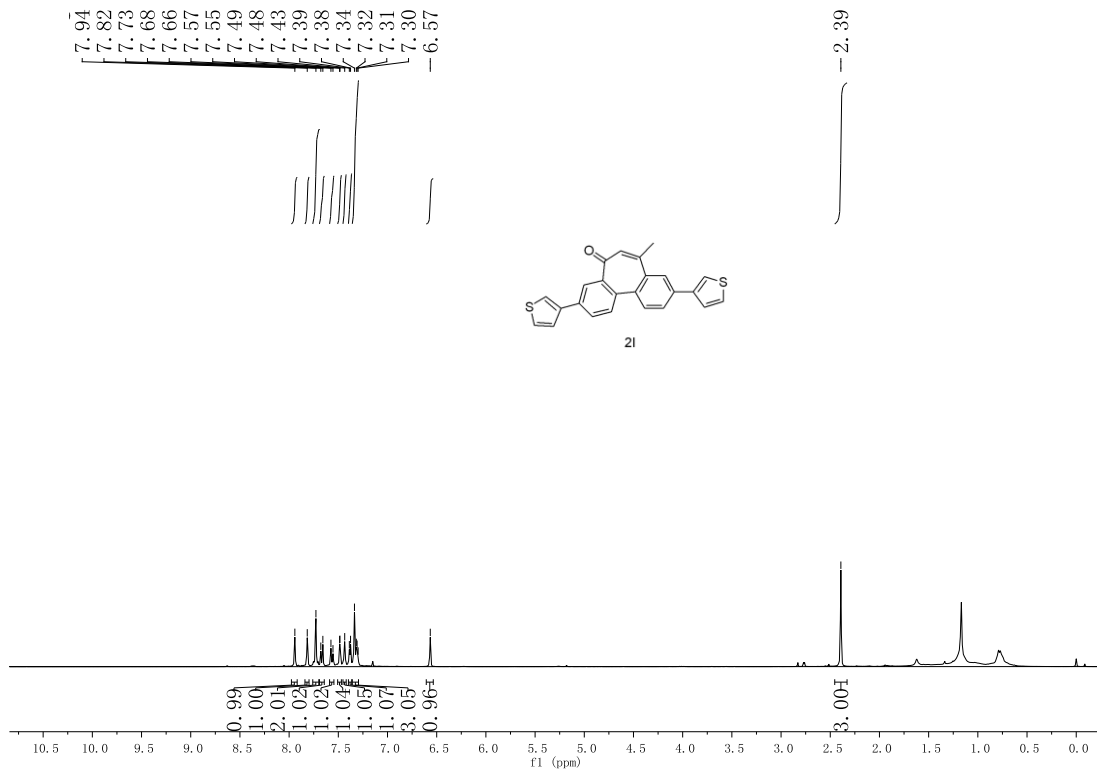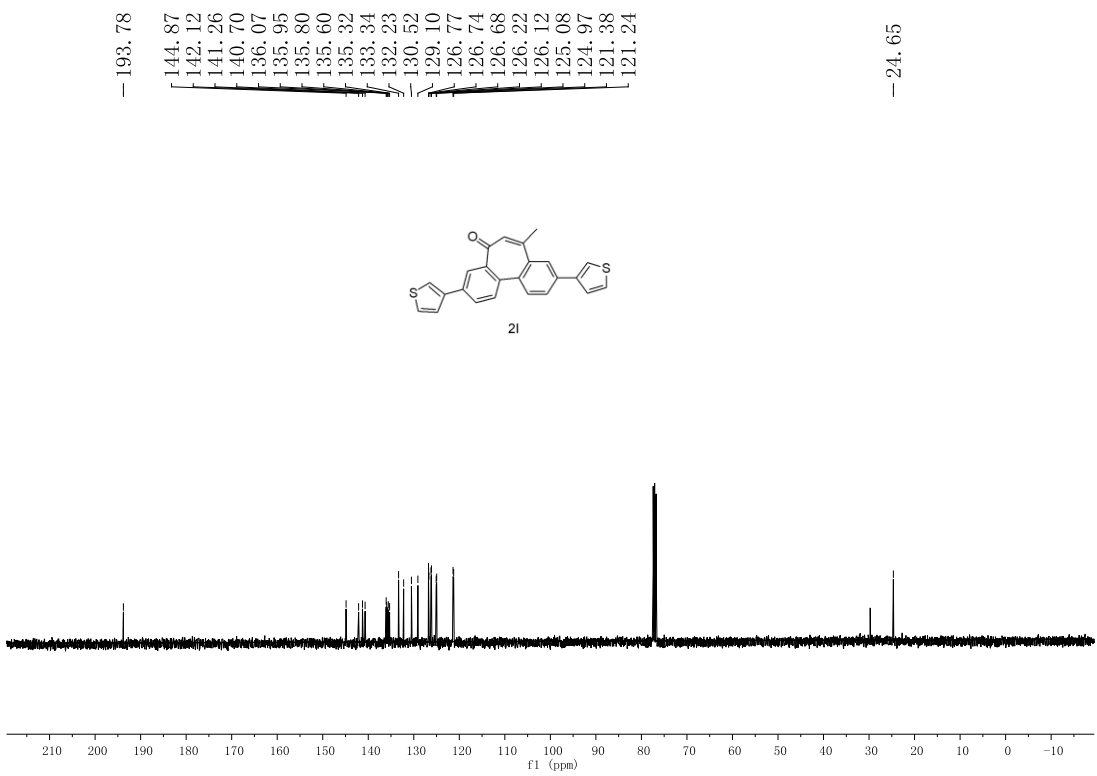

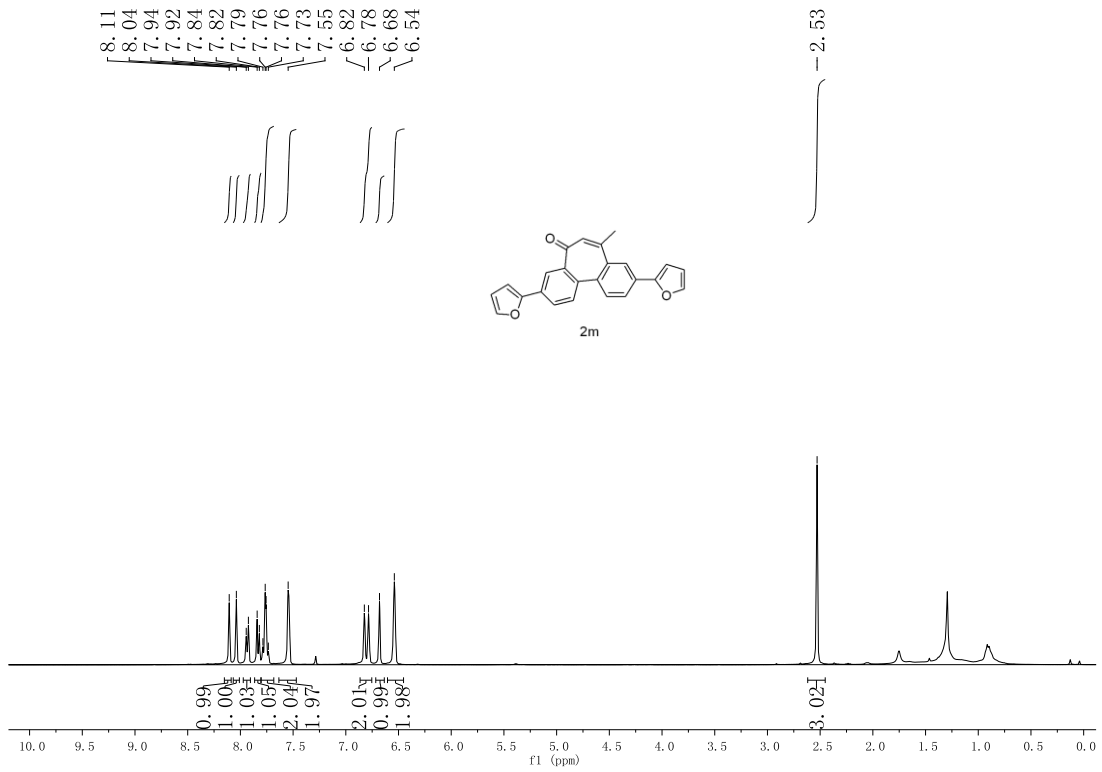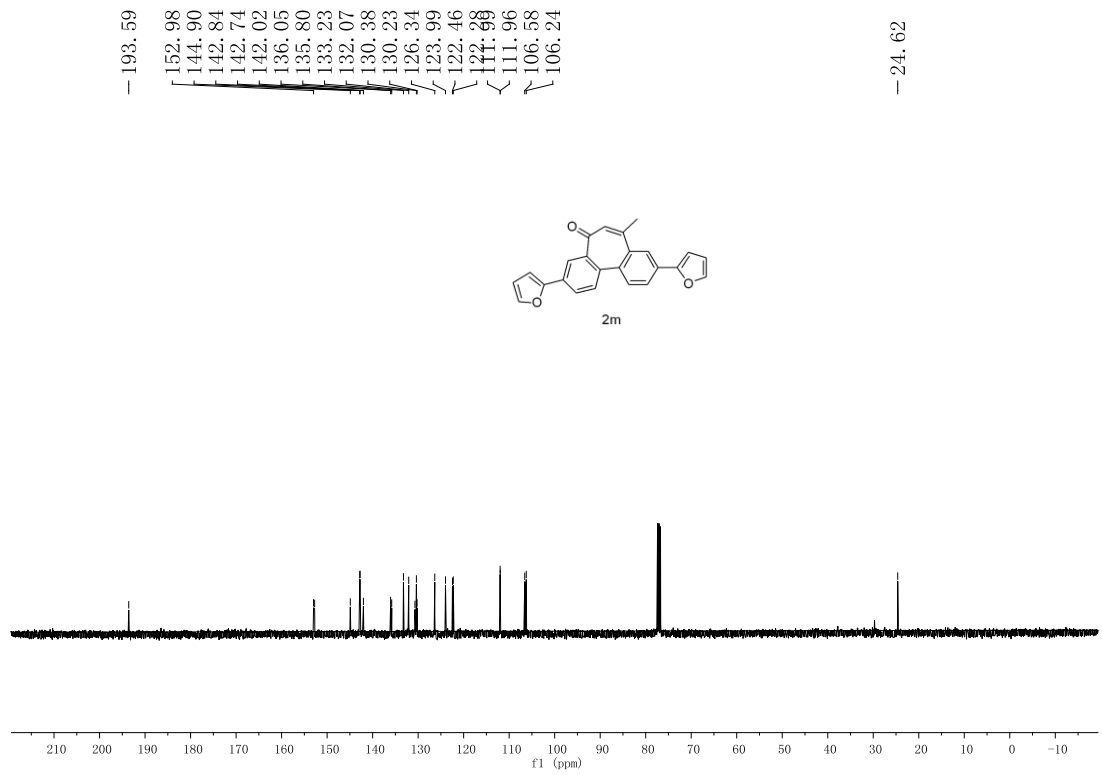

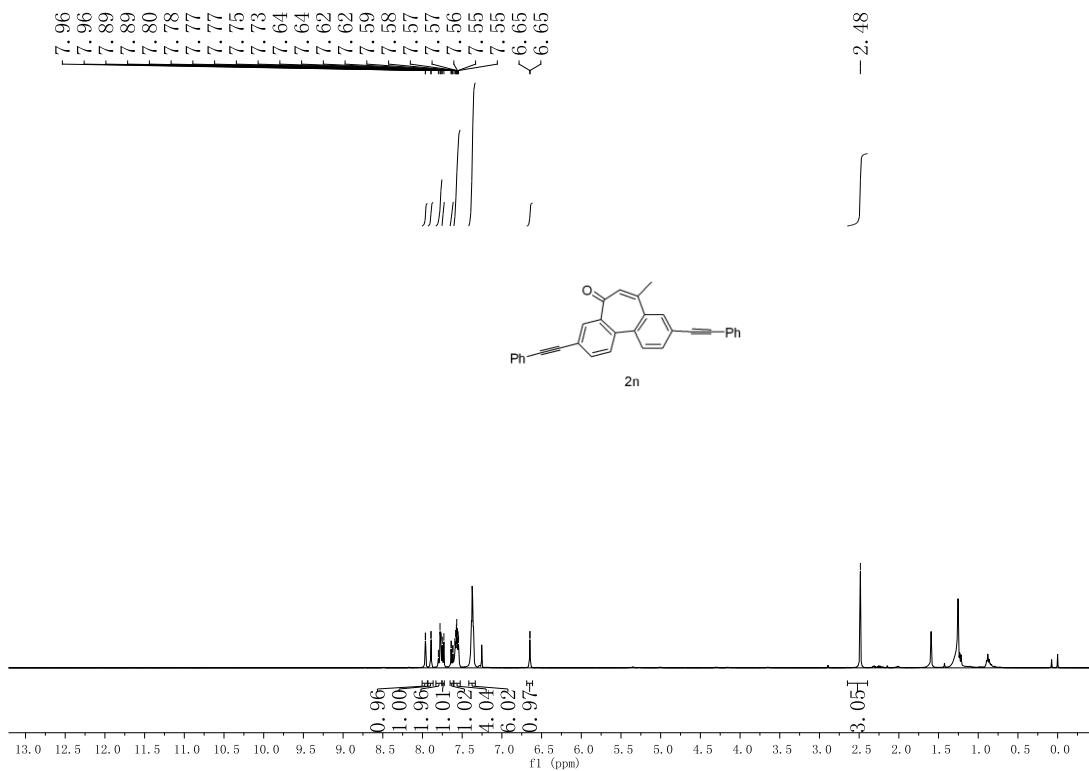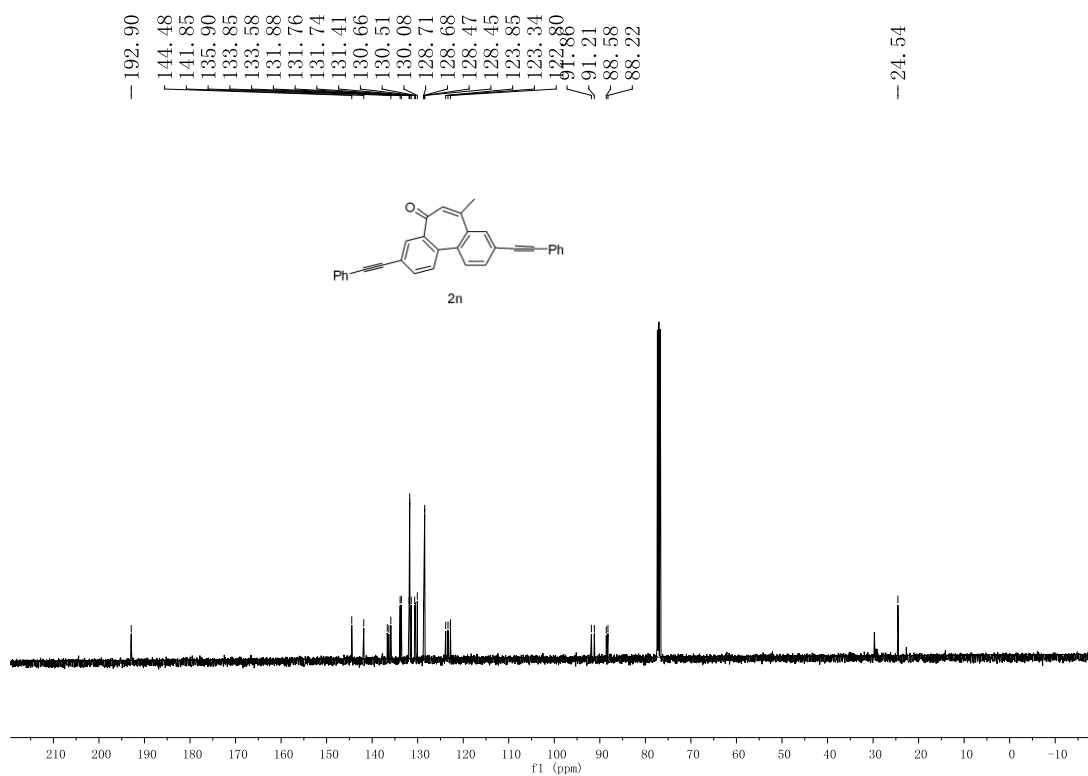

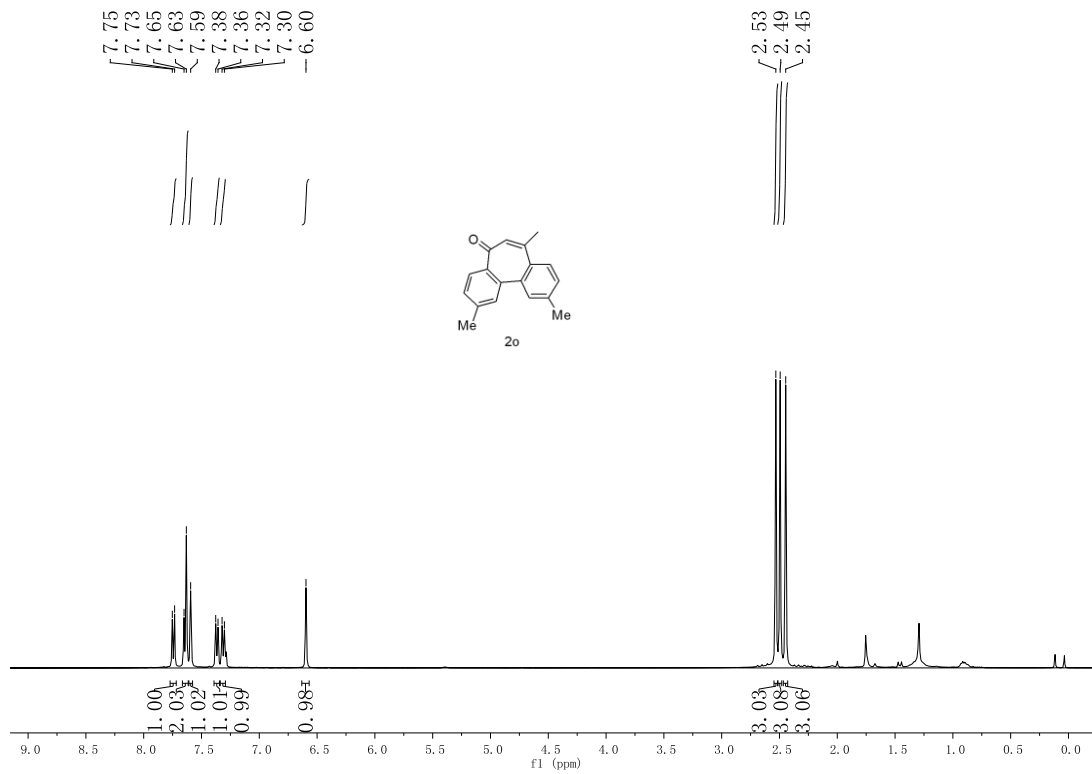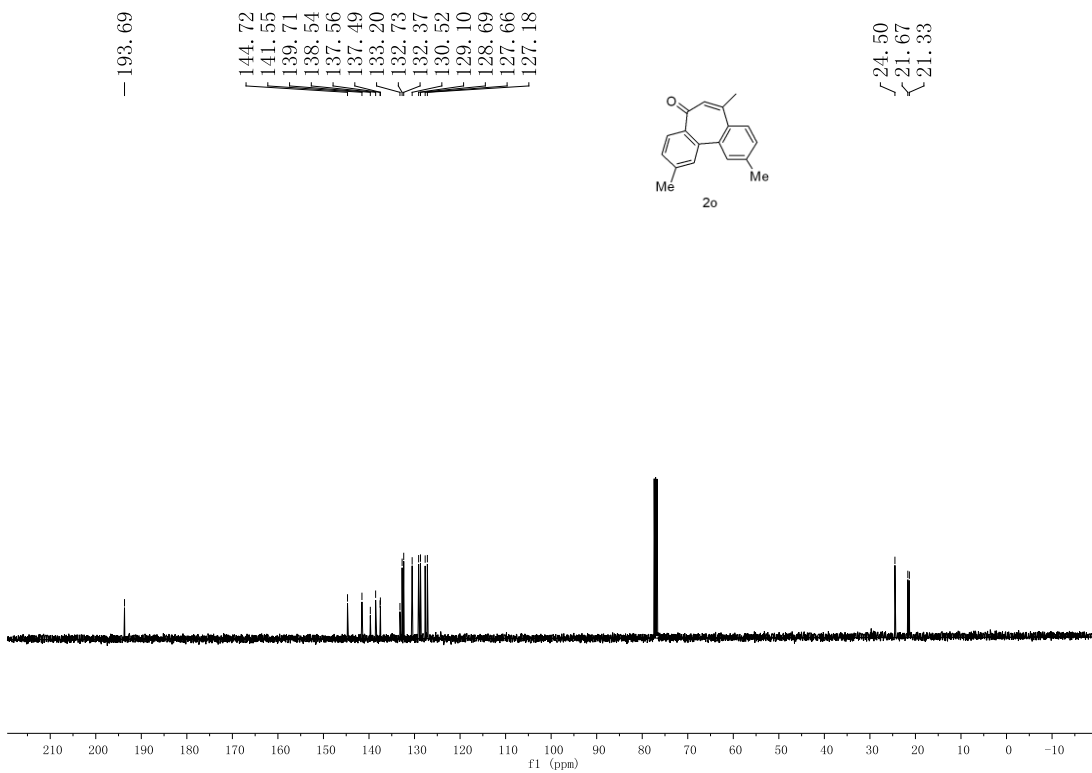

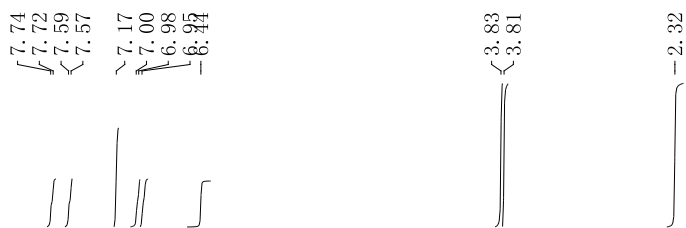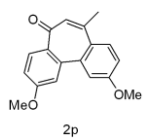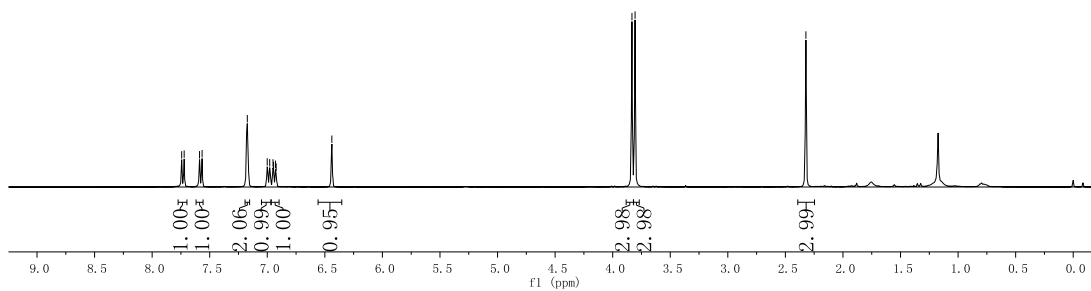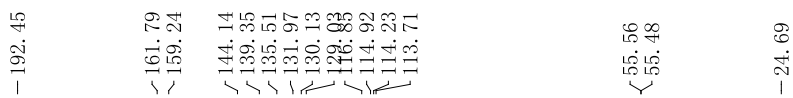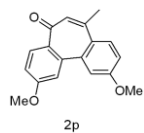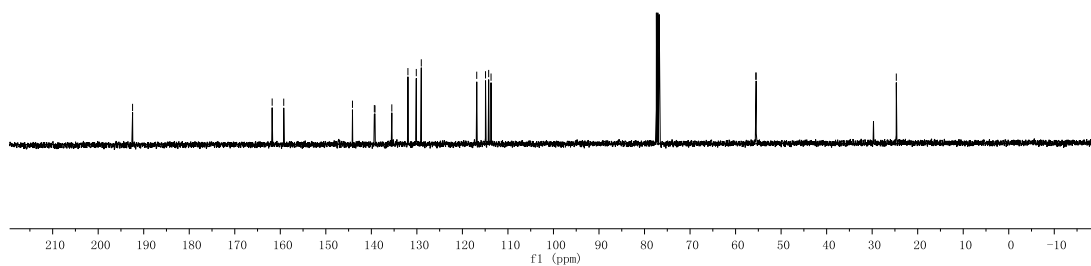



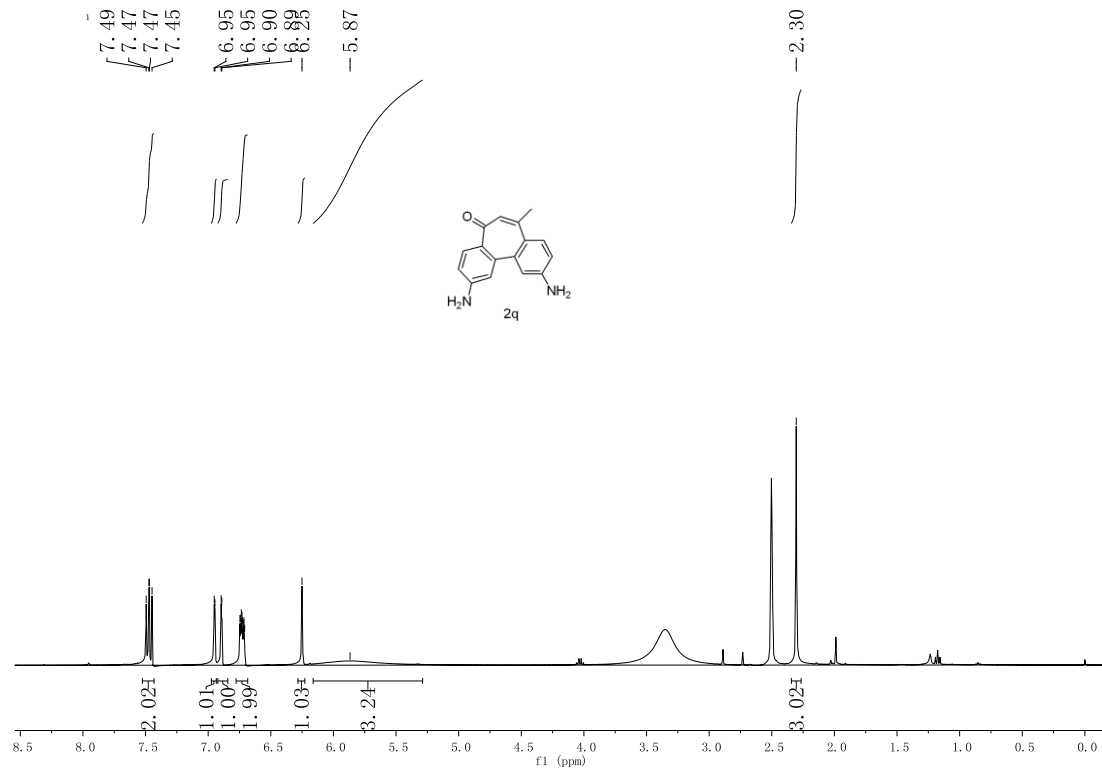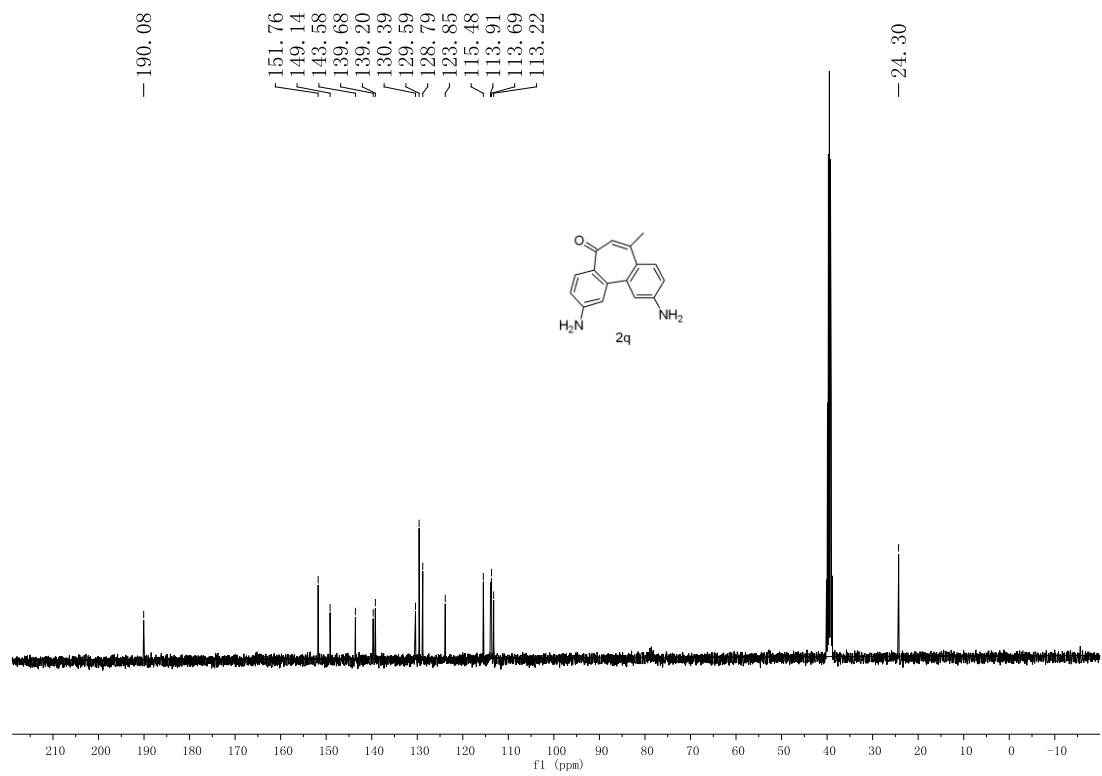

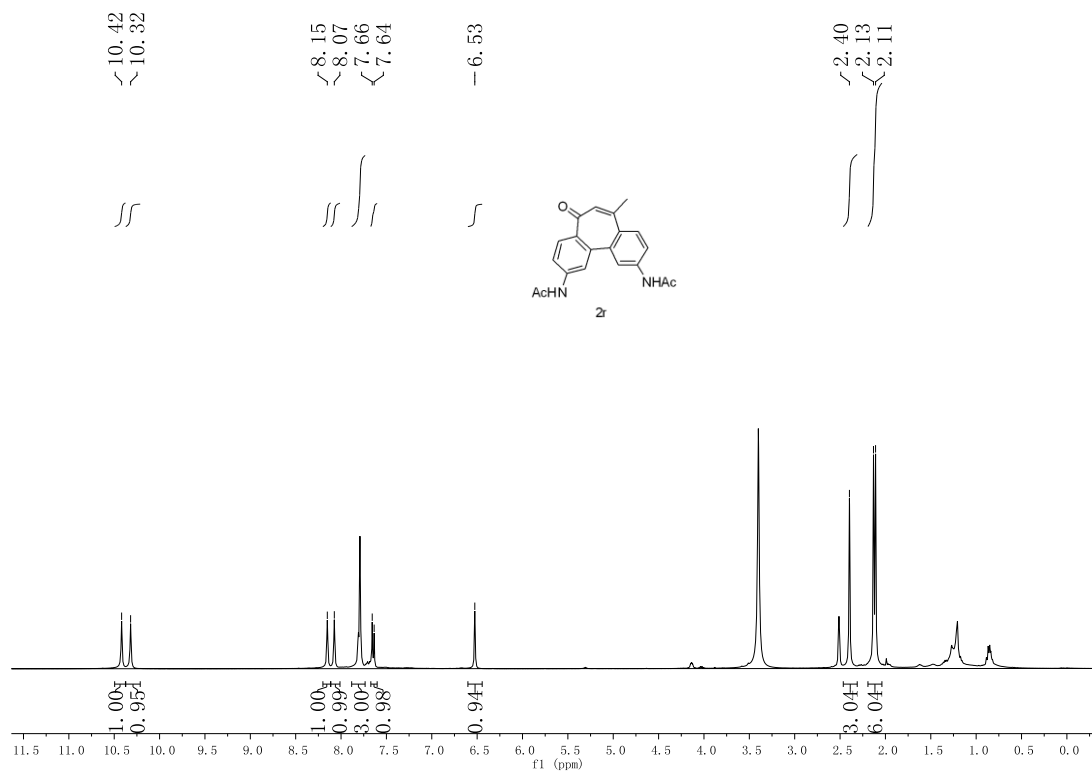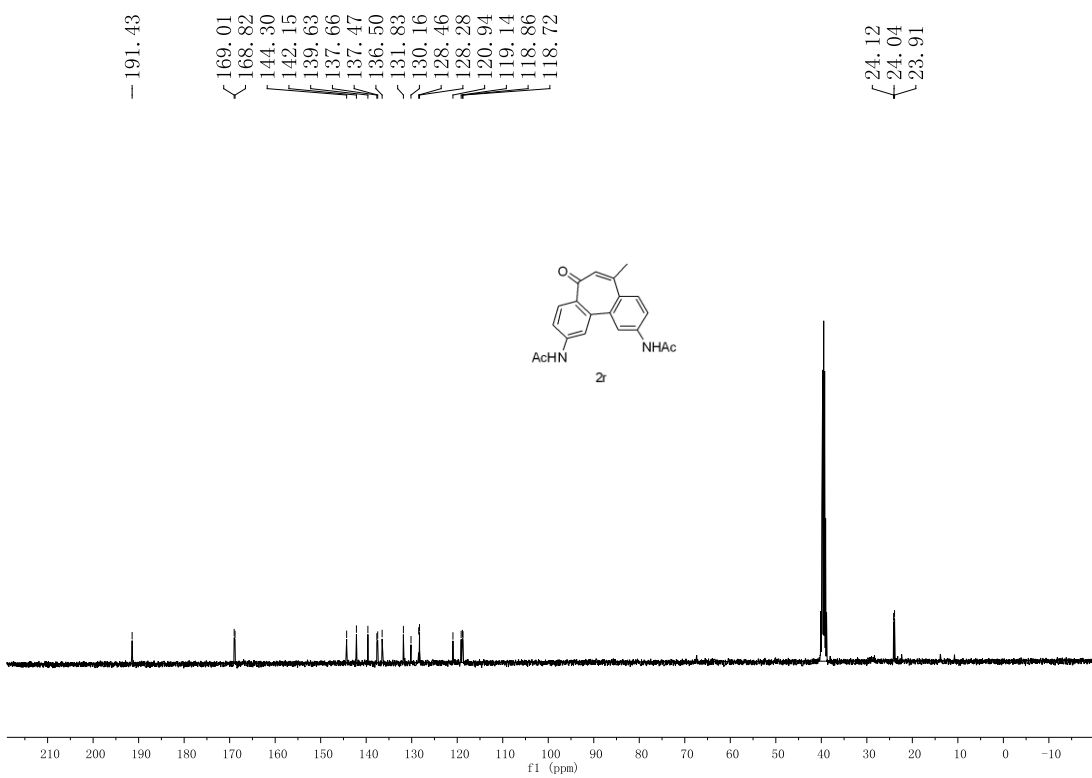

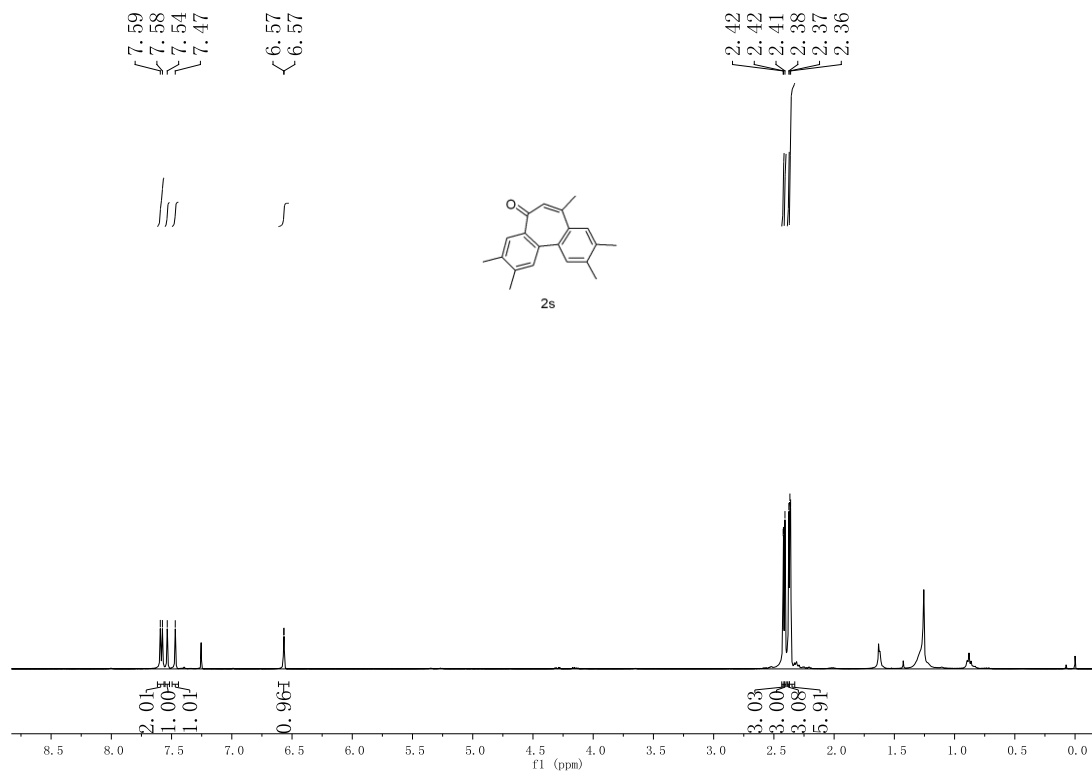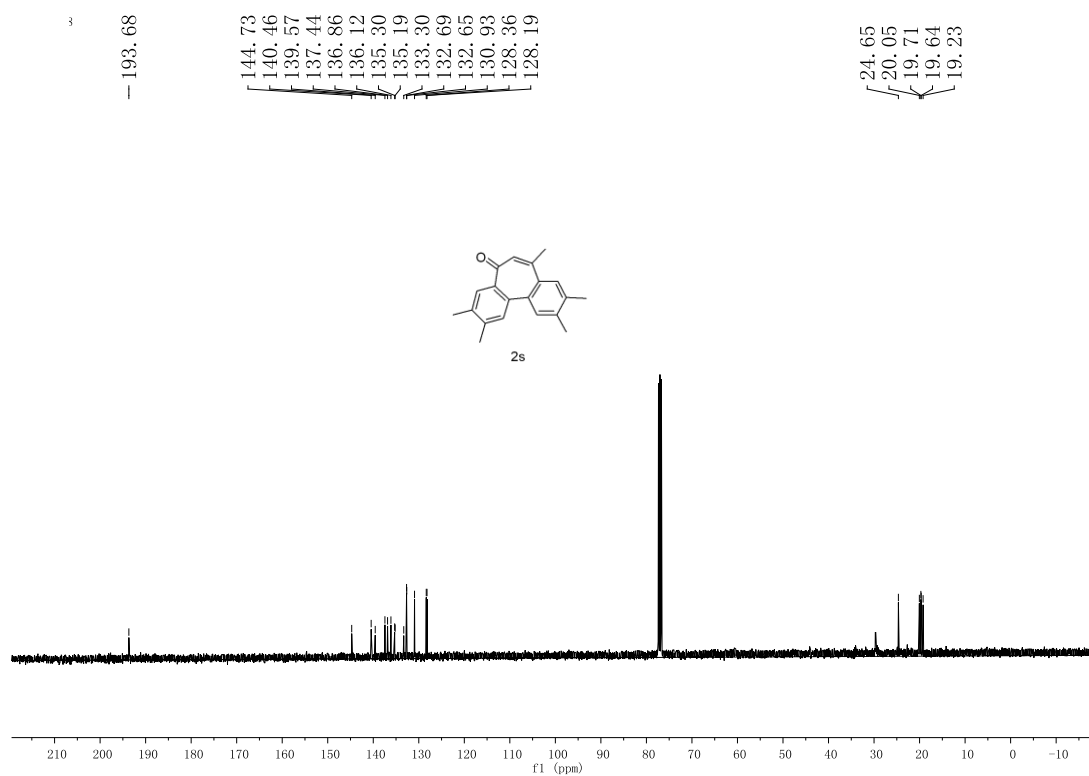

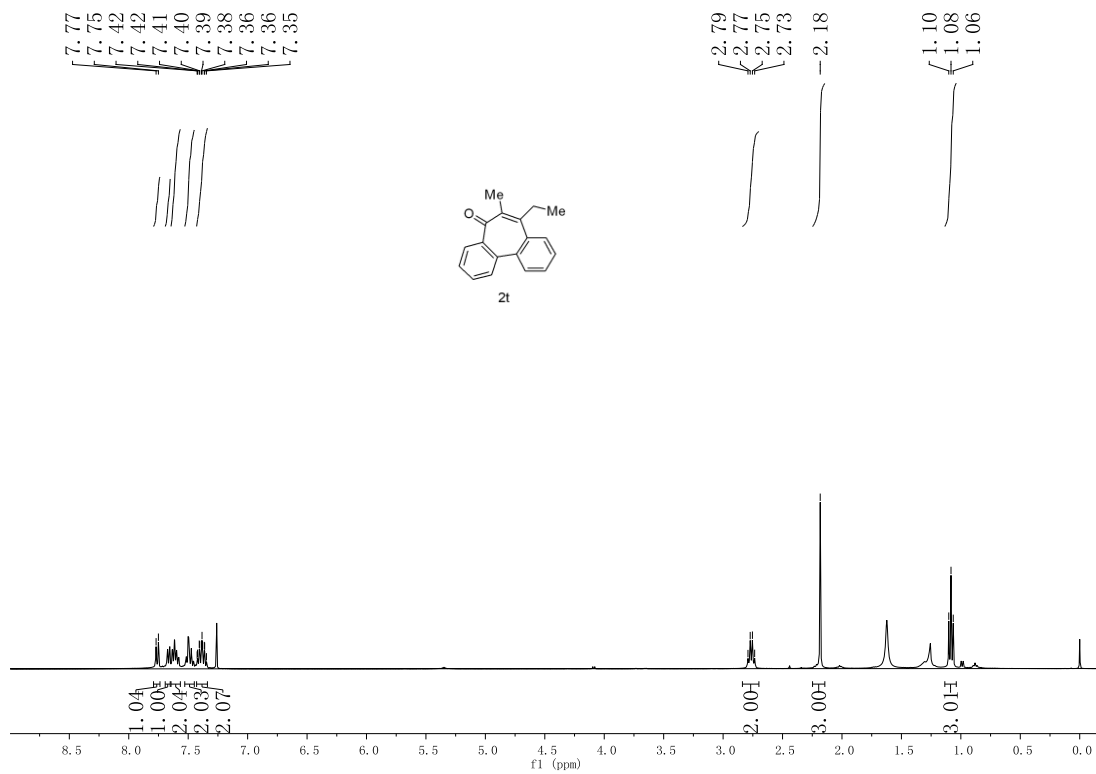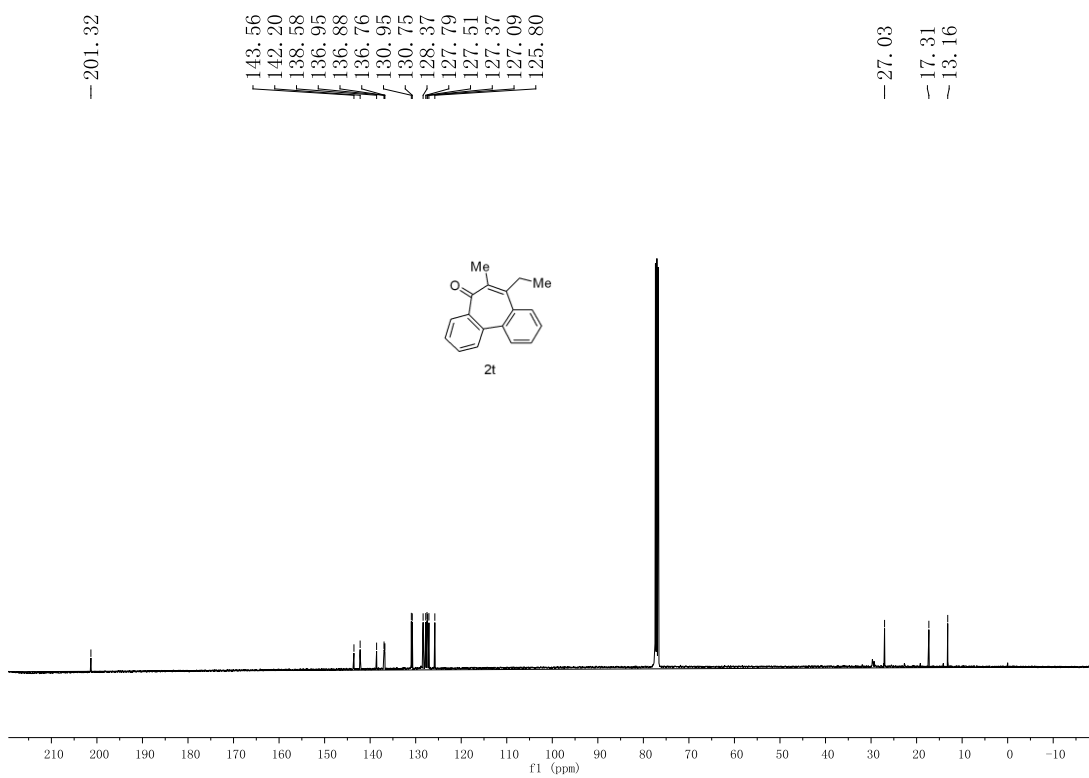

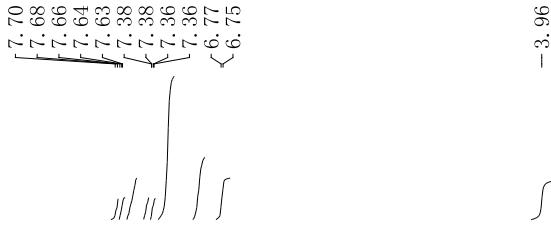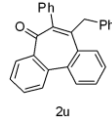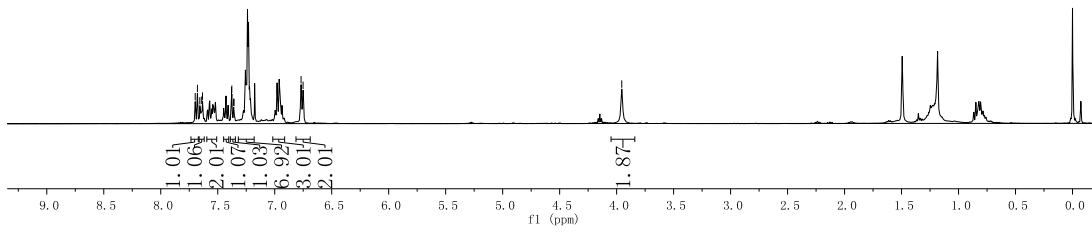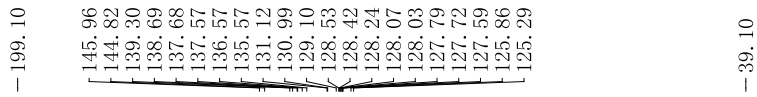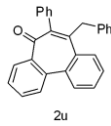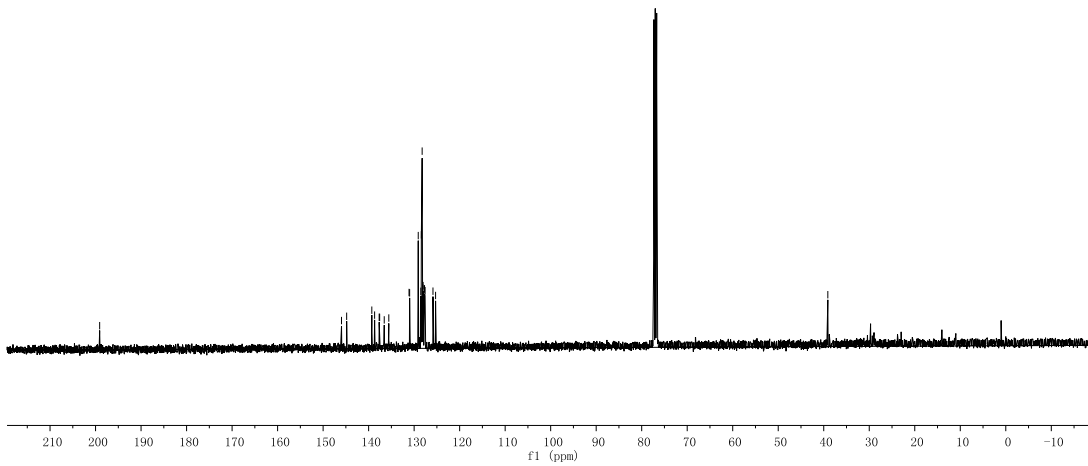

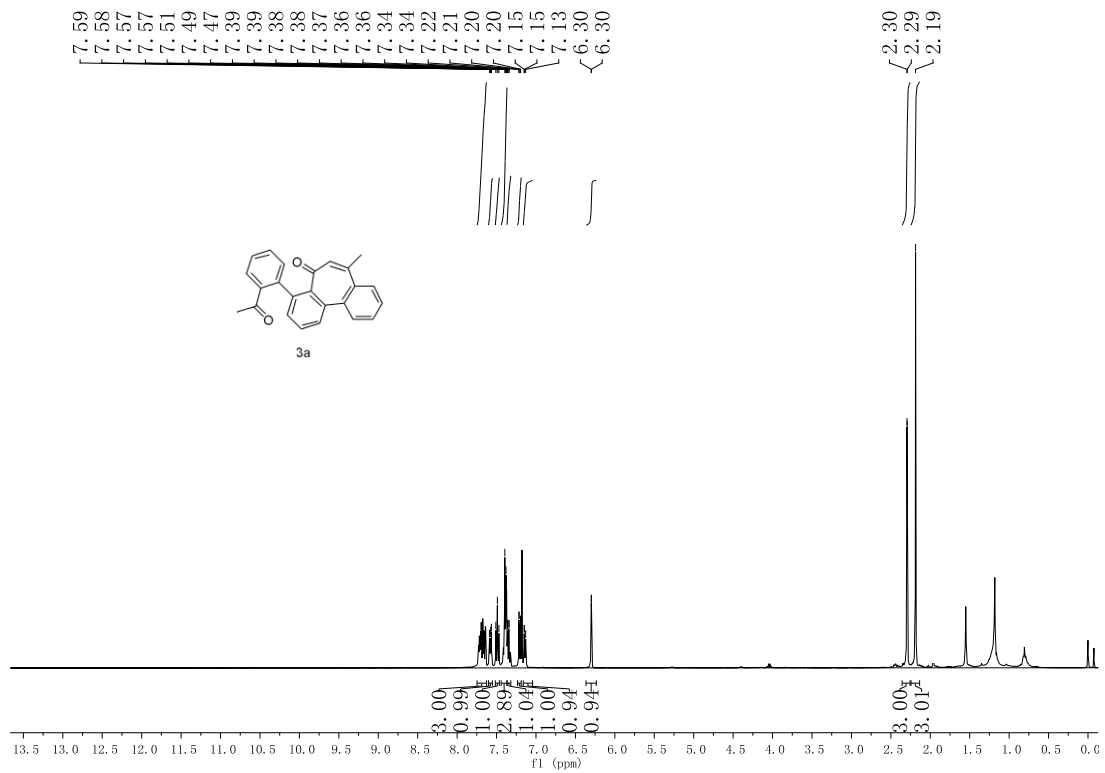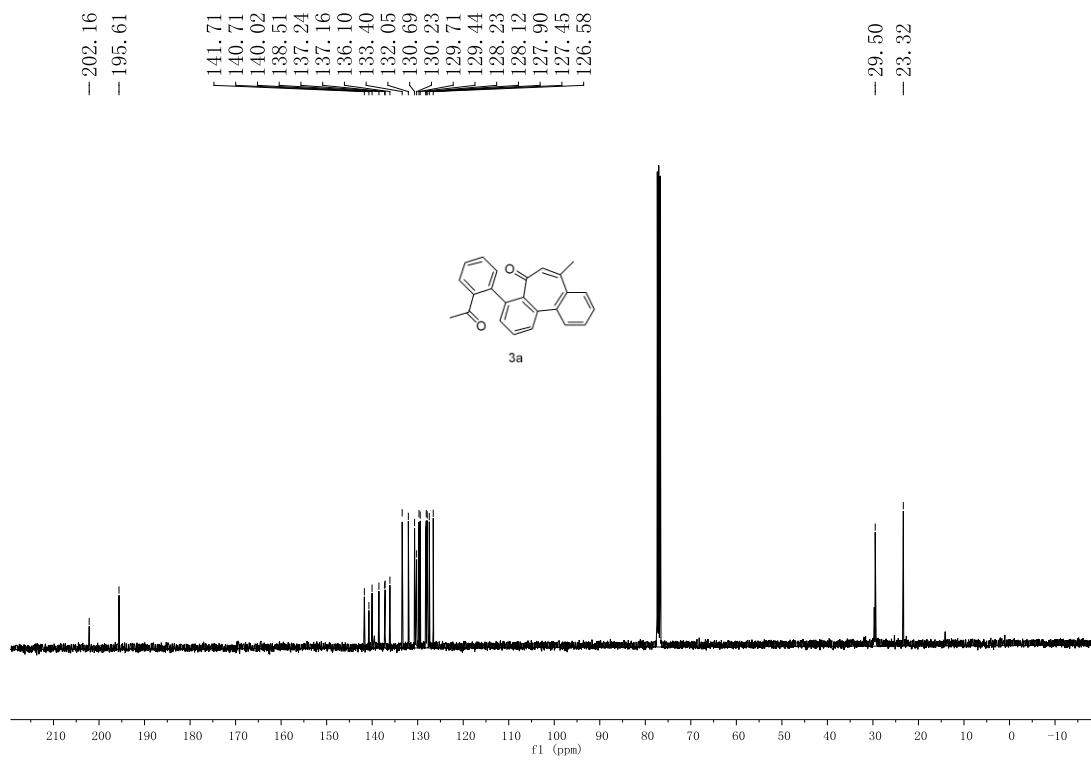

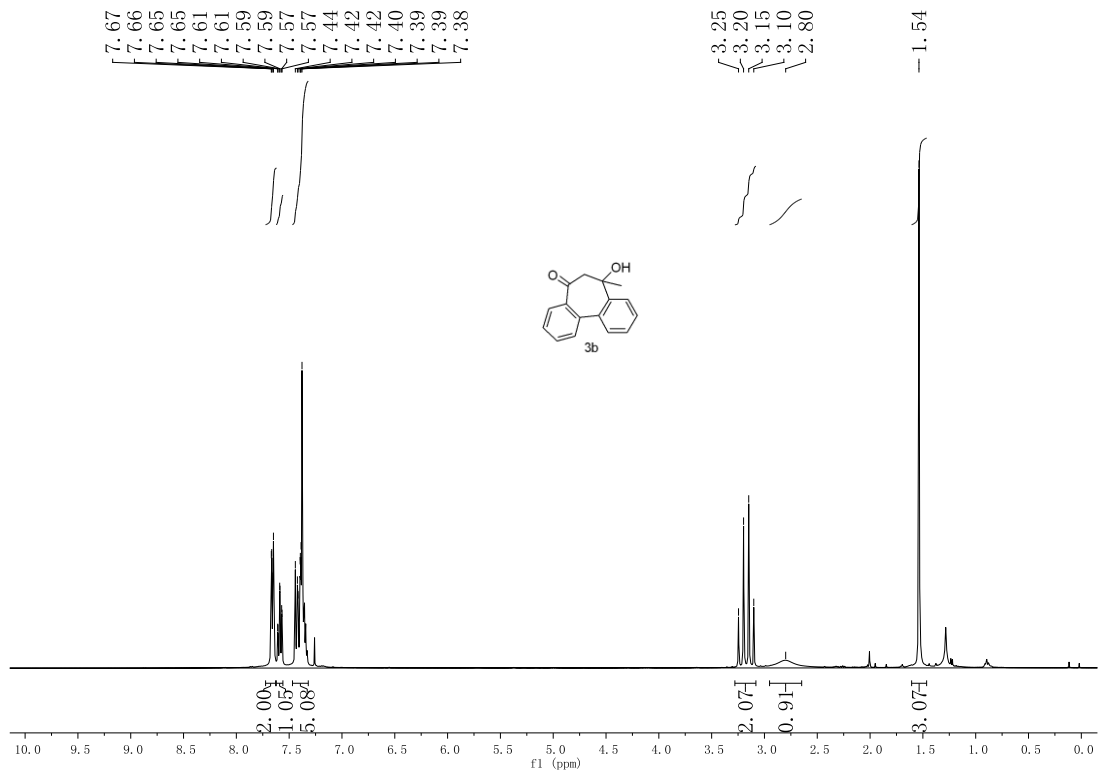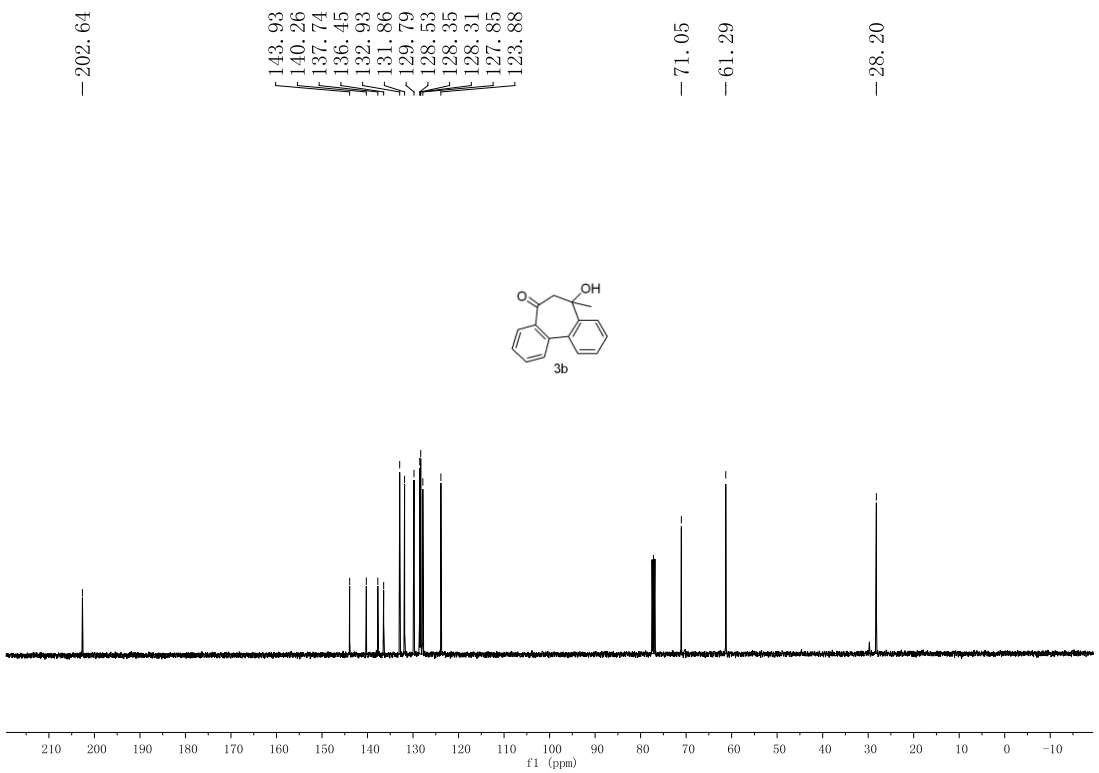

Supplement: c4ra02055c1.pdf [file c4ra02055c1.pdf]
